# Supplementary material for: iTRAQ-based quantitative proteomic analysis of heat stress-induced mechanisms in pepper seedlings
Source: PeerJ. 2021 Jun 3;9:e11509. doi: 10.7717/peerj.11509 (PMC8180192; doi:10.7717/peerj.11509)
Supplement: Supplemental Information 7 [file peerj-09-11509-s007.xlsx]

## Sheet: Sheet1
Table S5 Gene Ontology (GO) annotation of HT-Specific DAPs in response to heat stress.
GO classify1	GO classify2	All PRO	Partial PRO	PRO ID
Total_PRO		3507	420
cellular component	extracellular region	522	54	Capana11g000097;Capana04g000809;Capana07g002104;Capana00g002279;Capana08g001422;Capana09g001643;Capana01g000354;Capana09g002222;Capana09g000614;Capana04g002872;Capana01g002323;Capana03g001297;Capana10g001668;Capana10g001751;Capana08g002432;Capana00g001503;Capana10g000740;Capana00g003097;Capana04g000900;Capana01g003244;Capana00g002531;Capana07g002194;Capana11g000057;Capana04g001698;Capana03g003665…
cellular component	cell	3171	378	Capana01g001865;Capana03g001767;Capana10g000469;Capana06g000223;Capana03g001456;Capana06g001315;Capana03g003571;Capana06g000393;Capana06g001412;Capana10g001437;Capana00g001211;Capana03g001694;Capana02g002691;Capana03g002552;Capana03g000290;Capana09g001785;Capana00g005002;Capana03g004370;Capana09g000163;Capana08g001079;Capana12g000224;Capana04g000054;Capana06g000591;Capana09g000118;Capana00g005054…
cellular component	nucleoid	18	2	Capana06g002374;Capana05g002104
cellular component	membrane	1768	232	Capana00g001145;Capana09g002222;Capana01g000354;Capana12g000241;Capana07g002128;Capana01g003759;Capana05g000833;Capana06g001731;Capana05g002294;Capana00g003780;Capana11g000253;Capana12g000480;Capana11g000280;Capana04g000809;Capana12g001992;Capana02g002749;Capana10g000172;Capana03g003665;Capana05g001389;Capana01g003579;Capana01g000497;Capana00g002444;Capana00g004765;Capana07g002328;Capana01g003244…
cellular component	virion	3	1	Capana04g002867
cellular component	cell junction	576	61	Capana11g000097;Capana04g002552;Capana02g001935;Capana00g003656;Capana12g000241;Capana01g000354;Capana09g002222;Capana09g000614;Capana04g000809;Capana12g001992;Capana02g002345;Capana05g002294;Capana05g000833;Capana06g001731;Capana08g001422;Capana10g001668;Capana10g001751;Capana04g001015;Capana02g002523;Capana00g001503;Capana03g001207;Capana08g002432;Capana10g002064;Capana01g002823;Capana09g002162…
cellular component	membrane-enclosed lumen	157	12	Capana01g003224;Capana10g002442;Capana00g002861;Capana10g001094;Capana04g000809;Capana02g002523;Capana02g001146;Capana01g003392;Capana03g003571;Capana04g001085;Capana09g002303;Capana05g002104
cellular component	macromolecular complex	791	108	Capana07g001693;Capana00g002133;Capana08g001152;Capana00g004669;Capana02g000651;Capana06g000853;Capana00g001862;Capana06g000850;Capana01g003185;Capana06g000591;Capana01g000017;Capana10g001094;Capana01g003678;Capana01g000694;Capana03g001456;Capana01g001865;Capana03g002906;Capana07g000611;Capana06g001315;Capana02g002691;Capana01g002147;Capana10g001437;Capana00g001211;Capana11g002272;Capana11g000598…
cellular component	organelle	2815	352	Capana05g001389;Capana03g002577;Capana09g000692;Capana07g002328;Capana01g001540;Capana09g002162;Capana00g001503;Capana04g000353;Capana01g001047;Capana07g002128;Capana01g003759;Capana05g000833;Capana06g001731;Capana05g002294;Capana11g000253;Capana05g000935;Capana00g003780;Capana11g000280;Capana12g001992;Capana12g000480;Capana00g001145;Capana01g001030;Capana09g002222;Capana01g000354;Capana12g002019…
cellular component	extracellular region part	31	7	Capana06g000557;Capana02g002478;Capana02g002479;Capana00g002861;Capana08g002409;Capana00g002279;Capana03g000094
cellular component	organelle part	1838	226	Capana11g000177;Capana10g000172;Capana05g002294;Capana05g000935;Capana11g000280;Capana12g001992;Capana04g000809;Capana06g001731;Capana05g000833;Capana01g003759;Capana12g002019;Capana09g002222;Capana07g002013;Capana04g000353;Capana00g001503;Capana01g000410;Capana02g002540;Capana00g002444;Capana09g000692;Capana07g002328;Capana01g003579;Capana03g002577;Capana03g003571;Capana09g002303;Capana06g000393…
cellular component	virion part	3	1	Capana04g002867
cellular component	membrane part	562	76	Capana03g004400;Capana06g000155;Capana08g002008;Capana01g003356;Capana12g001007;Capana01g002586;Capana00g003308;Capana07g000268;Capana07g001245;Capana03g002267;Capana12g001027;Capana07g000617;Capana07g002392;Capana03g001910;Capana07g000227;Capana00g003428;Capana11g002360;Capana07g000191;Capana06g002727;Capana08g002856;Capana02g000901;Capana08g002554;Capana08g000961;Capana10g000141;Capana03g004142…
cellular component	cell part	3197	378	Capana02g002749;Capana10g000172;Capana11g000177;Capana03g000027;Capana04g000809;Capana01g002323;Capana07g002013;Capana01g000410;Capana02g002540;Capana11g000962;Capana12g000382;Capana01g003579;Capana00g002444;Capana00g004765;Capana06g001315;Capana03g003571;Capana06g000393;Capana01g001865;Capana03g001767;Capana06g000223;Capana03g001456;Capana10g000469;Capana03g000290;Capana03g002552;Capana09g001785…
cellular component	supramolecular complex	31	2	Capana05g000363;Capana11g001981
molecular function	transcription factor activity, protein binding	8	0
molecular function	nucleic acid binding transcription factor activity	43	2	Capana01g002823;Capana10g002123
molecular function	catalytic activity	2098	225	Capana04g000900;Capana07g002194;Capana01g003224;Capana00g003786;Capana08g000503;Capana09g001505;Capana05g002104;Capana07g001111;Capana12g001207;Capana08g000873;Capana02g003105;Capana07g002487;Capana03g000633;Capana10g001912;Capana00g004972;Capana00g002792;Capana02g002345;Capana05g000740;Capana01g000823;Capana08g000961;Capana00g004704;Capana08g001395;Capana03g000142;Capana08g002794;Capana11g000751…
molecular function	signal transducer activity	44	3	Capana12g000241;Capana07g001488;Capana01g000312
molecular function	structural molecule activity	213	37	Capana12g000184;Capana01g000017;Capana01g000694;Capana06g000142;Capana06g000591;Capana06g000853;Capana10g000033;Capana01g004118;Capana00g004669;Capana08g001152;Capana10g002435;Capana06g000723;Capana01g001123;Capana08g001935;Capana02g002691;Capana10g001437;Capana07g000611;Capana06g001315;Capana07g002243;Capana03g001456;Capana10g002431;Capana03g001608;Capana02g001336;Capana09g000692;Capana04g001698…
molecular function	transporter activity	219	27	Capana00g002133;Capana12g000720;Capana08g001871;Capana02g001348;Capana01g002823;Capana12g001027;Capana11g002390;Capana04g000054;Capana09g002162;Capana07g002487;Capana02g003411;Capana06g002985;Capana02g001336;Capana11g002360;Capana00g003428;Capana06g000557;Capana12g001007;Capana03g001978;Capana04g001070;Capana08g002856;Capana06g002727;Capana03g002267;Capana12g002019;Capana00g002742;Capana07g000268…
molecular function	binding	2100	240	Capana08g002008;Capana08g001498;Capana10g001946;Capana06g000377;Capana09g000691;Capana03g000094;Capana07g000331;Capana00g003308;Capana07g000545;Capana04g000885;Capana10g000033;Capana01g003392;Capana10g001701;Capana02g000204;Capana07g000617;Capana11g001954;Capana07g002392;Capana10g001287;Capana09g000884;Capana12g001027;Capana11g000376;Capana03g002454;Capana02g003489;Capana00g000875;Capana08g000343…
molecular function	electron carrier activity	100	12	Capana08g000733;Capana02g001146;Capana10g001912;Capana02g000862;Capana02g000651;Capana01g001865;Capana04g000166;Capana10g001946;Capana03g002267;Capana00g001211;Capana00g003308;Capana07g002194
molecular function	antioxidant activity	65	5	Capana07g001507;Capana06g002374;Capana06g001731;Capana05g002104;Capana04g000557
molecular function	metallochaperone activity	3	0
molecular function	protein tag	1	0
molecular function	nutrient reservoir activity	9	1	Capana03g000094
molecular function	molecular transducer activity	20	2	Capana12g000499;Capana01g001047
molecular function	molecular function regulator	86	12	Capana00g003777;Capana02g001146;Capana12g000499;Capana01g002823;Capana06g000377;Capana02g001130;Capana10g001685;Capana09g001785;Capana03g003402;Capana07g002194;Capana04g000885;Capana01g001047
biological process	reproduction	747	70	Capana10g002507;Capana01g000694;Capana01g003678;Capana02g001299;Capana00g005002;Capana07g001693;Capana00g001862;Capana06g000850;Capana06g001178;Capana12g000224;Capana04g001008;Capana00g004883;Capana01g002147;Capana06g000393;Capana04g000557;Capana03g003571;Capana03g002577;Capana09g000692;Capana02g000690;Capana07g002333;Capana03g001207;Capana10g002064;Capana08g002432;Capana05g002207;Capana10g001751…
biological process	cell killing	9	0
biological process	immune system process	302	35	Capana01g001093;Capana00g002110;Capana07g001507;Capana03g000487;Capana09g002162;Capana01g001540;Capana01g002823;Capana08g002432;Capana10g002064;Capana03g001297;Capana05g000833;Capana04g000809;Capana12g000241;Capana10g002123;Capana01g000694;Capana11g001383;Capana05g000340;Capana10g001685;Capana05g000363;Capana00g001862;Capana07g002392;Capana11g001954;Capana10g001701;Capana02g001299;Capana07g001693…
biological process	metabolic process	2920	337	Capana09g001518;Capana09g000016;Capana04g001493;Capana09g000128;Capana11g001875;Capana00g003956;Capana08g000628;Capana10g000224;Capana02g002853;Capana01g000795;Capana01g003356;Capana10g002431;Capana02g003463;Capana06g002374;Capana07g000070;Capana02g003305;Capana07g001997;Capana03g000906;Capana10g002435;Capana09g000405;Capana03g002476;Capana11g002390;Capana11g001010;Capana09g000614;Capana01g000647…
biological process	cellular process	2990	339	Capana04g000809;Capana02g002749;Capana00g001716;Capana10g000172;Capana11g000177;Capana01g003619;Capana10g002487;Capana01g000410;Capana11g000962;Capana12g000382;Capana01g003579;Capana00g002444;Capana00g004765;Capana07g002013;Capana03g002552;Capana03g000290;Capana09g001785;Capana03g001694;Capana00g001211;Capana10g001437;Capana06g001412;Capana02g002691;Capana06g001315;Capana06g000393;Capana03g003571…
biological process	reproductive process	736	70	Capana01g001540;Capana12g001545;Capana12g002296;Capana08g002432;Capana03g001207;Capana10g002064;Capana10g001751;Capana11g000213;Capana07g002333;Capana03g003665;Capana03g002577;Capana02g000690;Capana09g000692;Capana02g002749;Capana10g000172;Capana04g000917;Capana07g002128;Capana07g001488;Capana06g001731;Capana04g000140;Capana09g002222;Capana01g000354;Capana09g000248;Capana12g000241;Capana06g000850…
biological process	biological adhesion	26	1	Capana03g004596
biological process	signaling	442	48	Capana05g000363;Capana03g001387;Capana00g000875;Capana10g002507;Capana10g001701;Capana06g001253;Capana07g001693;Capana07g002392;Capana09g000405;Capana11g001010;Capana00g001862;Capana03g002267;Capana11g001875;Capana01g002147;Capana03g000094;Capana04g000885;Capana01g000795;Capana06g000557;Capana01g003356;Capana03g000245;Capana06g000393;Capana12g002652;Capana01g000312;Capana00g002444;Capana04g000333…
biological process	multicellular organismal process	893	88	Capana04g000917;Capana02g002749;Capana10g000172;Capana01g004487;Capana04g000140;Capana04g000809;Capana07g001488;Capana01g003759;Capana12g000241;Capana09g002222;Capana12g002296;Capana12g001545;Capana11g000130;Capana01g001540;Capana11g000213;Capana03g001297;Capana03g001207;Capana08g002432;Capana00g002110;Capana07g002333;Capana10g002487;Capana02g000690;Capana09g000692;Capana07g001507;Capana03g002577…
biological process	developmental process	1247	129	Capana08g001395;Capana08g002794;Capana02g001935;Capana05g000740;Capana01g000823;Capana03g002028;Capana10g001912;Capana00g004972;Capana12g001207;Capana01g002823;Capana05g002104;Capana07g001111;Capana04g001698;Capana04g000900;Capana09g001087;Capana07g002194;Capana00g004464;Capana10g000432;Capana08g001498;Capana03g004400;Capana08g002675;Capana03g000094;Capana07g000331;Capana04g000885;Capana02g000204…
biological process	growth	343	38	Capana05g000363;Capana02g003305;Capana11g001981;Capana02g000204;Capana12g001027;Capana04g001008;Capana01g002147;Capana08g000628;Capana01g000795;Capana07g000331;Capana10g000176;Capana01g003356;Capana04g000557;Capana06g000393;Capana03g003571;Capana02g000940;Capana07g001507;Capana04g001698;Capana02g000690;Capana07g002328;Capana01g001093;Capana07g002333;Capana00g001503;Capana10g002064;Capana10g001751…
biological process	locomotion	5	0
biological process	single-organism process	2698	300	Capana00g005002;Capana03g004370;Capana09g000163;Capana08g001079;Capana12g000224;Capana09g000118;Capana01g000694;Capana02g000416;Capana01g001865;Capana03g001456;Capana06g000223;Capana03g001767;Capana06g001315;Capana06g000393;Capana03g003571;Capana03g001694;Capana06g001412;Capana00g001211;Capana02g002691;Capana03g000290;Capana03g002552;Capana09g001785;Capana07g002013;Capana11g000962;Capana12g000382…
biological process	biological phase	17	2	Capana03g000906;Capana03g002028
biological process	rhythmic process	40	6	Capana04g000809;Capana12g002296;Capana01g001540;Capana07g001693;Capana11g000751;Capana11g000962
biological process	response to stimulus	2104	225	Capana03g001387;Capana00g004151;Capana01g003678;Capana10g002507;Capana02g003411;Capana10g002442;Capana10g000102;Capana05g000363;Capana06g001178;Capana06g000850;Capana00g001032;Capana02g001299;Capana07g001693;Capana00g002133;Capana02g001796;Capana01g002957;Capana01g001123;Capana04g001008;Capana12g000027;Capana02g000940;Capana07g001003;Capana04g000557;Capana07g000611;Capana08g000700;Capana02g001146…
biological process	localization	1182	140	Capana07g002392;Capana10g001701;Capana02g000204;Capana12g001027;Capana10g001287;Capana09g000884;Capana12g000376;Capana00g003428;Capana03g002454;Capana01g004439;Capana10g002123;Capana08g002008;Capana08g001498;Capana07g002243;Capana04g002783;Capana09g000691;Capana03g000094;Capana00g003308;Capana07g000331;Capana00g002792;Capana08g001871;Capana12g000720;Capana07g002487;Capana01g002823;Capana06g000621…
biological process	multi-organism process	707	89	Capana09g001785;Capana06g000390;Capana03g002552;Capana03g001694;Capana04g001008;Capana01g002147;Capana06g001412;Capana02g000940;Capana03g003571;Capana07g002042;Capana01g000312;Capana06g000557;Capana02g001146;Capana05g000785;Capana00g004151;Capana01g000694;Capana04g001262;Capana02g003411;Capana05g000363;Capana00g001862;Capana02g001299;Capana07g001693;Capana02g001796;Capana08g001152;Capana01g002957…
biological process	biological regulation	1599	178	Capana09g000061;Capana01g000694;Capana04g001262;Capana05g000340;Capana02g000416;Capana08g001152;Capana06g001253;Capana00g001862;Capana12g000224;Capana04g000054;Capana06g001412;Capana01g002147;Capana03g002552;Capana03g000290;Capana02g002179;Capana09g001785;Capana06g000390;Capana11g002272;Capana10g000176;Capana07g002042;Capana01g000312;Capana12g002652;Capana06g000393;Capana03g003571;Capana03g002577…
biological process	cellular component organization or biogenesis	1443	157	Capana02g000690;Capana07g001507;Capana08g001136;Capana07g002333;Capana11g000213;Capana10g001751;Capana08g000786;Capana08g002432;Capana10g002064;Capana04g001613;Capana12g002296;Capana03g001040;Capana11g000130;Capana12g001545;Capana03g003402;Capana03g003498;Capana03g002890;Capana07g001488;Capana04g000917;Capana03g000593;Capana05g000363;Capana10g000102;Capana10g001094;Capana01g003678;Capana12g002455…
biological process	detoxification	176	16	Capana04g001493;Capana09g000691;Capana09g002222;Capana01g002147;Capana04g000885;Capana06g001731;Capana04g000557;Capana06g002374;Capana07g001507;Capana12g000376;Capana12g000382;Capana00g000875;Capana08g001043;Capana04g001015;Capana05g002104;Capana06g000850
