# Supplementary material for: iTRAQ-based quantitative proteomic analysis of heat stress-induced mechanisms in pepper seedlings
Source: PeerJ. 2021 Jun 3;9:e11509. doi: 10.7717/peerj.11509 (PMC8180192; doi:10.7717/peerj.11509)
Supplement: Supplemental Information 8 [file peerj-09-11509-s008.xlsx]

## Sheet: Sheet1
Table S6 The DAPs involved in mainly metabolic processes in pepper under heat stress.
Metabolic processes	ID	Description	log2FC			log2FC			GO annotation	KEGG annotation	KEGG pathway annotation	COG class	COG class annotation
			HT3h/0h	HT28h/0h	HT48h/0h	HS3h/0h	HS28h/0h	HS48h/0h
Signal transduction	Capana03g001590	calmodulin	0.139668	0.0586184	0.420804	0.0948977	0.263829	0.287046	Biological Process: calcium-mediated signaling (GO:0019722);	K02183|Capana03g001590	Phosphatidylinositol signaling system (ko04070);; Plant-pathogen interaction (ko04626)	[TZDR]	--
	Capana01g003077	histidine-containing phosphotransfer protein 1-like	-0.142353	-0.156223	-0.254346	0.120197	0.272032	0.417166	Biological Process: regulation of cytokinin-activated signaling pathway (GO:0080036);	K14490|Capana01g003077	Plant hormone signal transduction (ko04075)	[T]	Signal transduction mechanisms
	Capana00g003291	nodal modulator 1	0.0155969	0.0207586	0.216556	-0.0178296	0.0014759	0.32988	Biological Process: mitochondria-nucleus signaling pathway (GO:0031930);	--	--	--	--
	Capana03g002830	acyl-	-0.102917	-0.0470829	0.132676	0.0121321	-0.0380626	0.282197	Biological Process: regulation of salicylic acid mediated signaling pathway (GO:2000031);	K03921|Capana03g002830	Fatty acid biosynthesis (ko00061);; Biosynthesis of unsaturated fatty acids (ko01040);; Fatty acid metabolism (ko01212)	--	--
	Capana02g003284	serine carboxypeptidase-like 25	0.0277806	-0.096167	-0.28091	0.0382048	-0.0188122	-0.335677	Biological Process: second-messenger-mediated signaling (GO:0019932);	--	--	[E]	Amino acid transport and metabolism
	Capana12g000179	serine carboxypeptidase-like 33	-0.0671537	-0.10194	-0.289691	-0.171005	-0.0222478	-0.269384	Biological Process: brassinosteroid mediated signaling pathway (GO:0009742);	--	--	--	--
	Capana00g003765	nudix hydrolase 2-like isoform x1	-0.19736	-0.177092	-0.411381	0.0362801	-0.0340336	-0.298446	Biological Process: positive regulation of salicylic acid mediated signaling pathway (GO:0080151);	--	--	[LR]	--
	Capana02g001991	serine carboxypeptidase-like 31	0.0124855	0.222124	0.549631	0.106108	-0.00991547	0.352655	Biological Process: second-messenger-mediated signaling (GO:0019932);	--	--	[E]	Amino acid transport and metabolism
	Capana08g002409	serine carboxypeptidase-like 26	0.154256	-0.0603225	-0.272173	-0.0663482	0.00729495	-0.0978302	Biological Process: second-messenger-mediated signaling (GO:0019932);	--	--	--	--
	Capana07g001488	serine threonine-protein kinase ht1	0.152834	0.0823698	0.331646	-0.0162851	0.0894244	0.248237	Biological Process: regulation of salicylic acid mediated signaling pathway (GO:2000031);	--	--	[RTKL]	--
	Capana01g000795	probable receptor-like protein kinase at5g47070	0.308893	0.42612	0.725203	0.356093	0.299356	0.106838	Biological Process: positive regulation of brassinosteroid mediated signaling pathway (GO:1900459);	--	--	[RTKL]	--
	Capana00g000598	probable serine threonine-protein kinase at5g41260	0.147829	0.0658413	0.239032	0.3324	0.320302	0.104979	Biological Process: zygote elongation (GO:0080159);	K14500|Capana00g000598	Plant hormone signal transduction (ko04075)	--	--
	Capana10g002124	calmodulin-7	-0.0176299	-0.44653	0.354626	0.0353526	0.112982	0.283206	Biological Process: peroxisome localization (GO:0060151);	K02183|Capana10g002124	Phosphatidylinositol signaling system (ko04070);; Plant-pathogen interaction (ko04626)	[TZDR]	--
	Capana09g001555	auxin transporter-like protein 2	-0.114845	-0.399392	-0.464761	0.0253039	-0.190294	-0.674782	Biological Process: cell wall organization (GO:0071555);	K13946|Capana09g001555	Plant hormone signal transduction (ko04075)	--	--
	Capana04g000111	probable serine threonine-protein kinase at4g35230	0.036887	0.129055	0.183564	0.0853975	0.231713	0.346127	Biological Process: zygote elongation (GO:0080159);	K14500|Capana04g000111	Plant hormone signal transduction (ko04075)	[RTKL]	--
	Capana06g001547	abscisic acid receptor pyr1-like	-0.201084	-0.24648	-0.505514	-0.0594227	-0.239934	-0.586495	Biological Process: regulation of protein serine/threonine phosphatase activity (GO:0080163);	K14496|Capana06g001547	Plant hormone signal transduction (ko04075)	--	--
	Capana10g001362	phosphoinositide phospholipase c 2-like	-0.344295	-0.343397	-0.587263	-0.032784	0.0609503	-0.280843	Biological Process: peroxisome localization (GO:0060151);	K05857|Capana10g001362	Inositol phosphate metabolism (ko00562);; Phosphatidylinositol signaling system (ko04070)	--	--
	Capana12g000499	abscisic acid receptor pyl2-like	-0.445523	-0.660972	-0.379821	-1.00642	-0.913918	-1.03861	Biological Process: regulation of protein serine/threonine phosphatase activity (GO:0080163);	K14496|Capana12g000499	Plant hormone signal transduction (ko04075)	--	--
	Capana10g002507	calmodulin-7	0.144759	-0.964817	0.640108	0.0538265	0.124549	0.258267	Biological Process: oxidation-reduction process (GO:0055114);	K02183|Capana10g002507	Phosphatidylinositol signaling system (ko04070);; Plant-pathogen interaction (ko04626)	[TZDR]	--
	Capana01g001047	abscisic acid receptor pyr1-like	0.255409	0.430337	-0.0025657	0.0241241	0.121647	0.0152556	Biological Process: regulation of protein serine/threonine phosphatase activity (GO:0080163);	K14496|Capana01g001047	Plant hormone signal transduction (ko04075)	--	--
	Capana01g003356	probable serine threonine-protein kinase at4g35230	-0.145207	-0.54608	-0.373187	0.11776	-0.0205963	-0.124513	Biological Process: zygote elongation (GO:0080159);	K14500|Capana01g003356	Plant hormone signal transduction (ko04075)	[RTKL]	--
	Capana03g001434	phytochrome-associated serine threonine-protein phosphatase 3-like	-0.174105	-0.337547	-0.0507619	0.311185	0.272942	0.0292467	Biological Process: regulation of auxin polar transport (GO:2000012);	--	--	[T]	Signal transduction mechanisms
	Capana03g002598	translation factor guf1 chloroplastic	-0.0721091	0.334145	0.103549	-0.400478	-0.631655	-0.377099	Biological Process: chloroplast RNA processing (GO:0031425);	--	--	[T]	Signal transduction mechanisms
	Capana10g000309	14-3-3 protein 9-like isoform x1	0.184331	0.278795	0.431089	-0.00989042	0.291203	0.334634	Biological Process: response to cadmium ion (GO:0046686);	--	--	[T]	Signal transduction mechanisms
	Capana03g002597	translation factor guf1 chloroplastic	0.0709625	-0.0515759	0.0243729	-0.115131	-0.30302	-0.246654	Biological Process: organic substance biosynthetic process (GO:1901576);	--	--	[T]	Signal transduction mechanisms
	Capana08g001601	universal stress protein a-like protein isoform x1	0.0499981	0.17052	0.202053	-0.0221363	0.268219	0.258429	Biological Process: response to stress (GO:0006950);	--	--	[T]	Signal transduction mechanisms
	Capana01g004116	probable protein phosphatase 2c 60 isoform x1	-0.0716983	-0.0601103	-0.101082	-0.087276	0.63458	-0.0155265	Molecular Function: metal ion binding (GO:0046872);	--	--	[T]	Signal transduction mechanisms
	Capana05g000202	universal stress protein a-like protein	-0.298067	-0.346076	0.141892	0.172517	0.299826	1.38573	Biological Process: response to stress (GO:0006950);	--	--	[T]	Signal transduction mechanisms
	Capana02g000552	14-3-3 protein 4	0.162468	0.234084	0.502754	-0.0319076	0.114222	0.392643	Biological Process: response to karrikin (GO:0080167);	--	--	[T]	Signal transduction mechanisms
	Capana09g002361	aci14 protein	-0.0618559	-0.125986	0.157274	-0.0640579	-0.0246346	0.310306	Molecular Function: hydrolase activity (GO:0016787);	--	--	[T]	Signal transduction mechanisms
	Capana09g001745	universal stress protein a-like protein	0.121578	0.080853	0.0663484	0.0769479	0.226485	0.554508	Biological Process: response to stress (GO:0006950);	--	--	[T]	Signal transduction mechanisms
	Capana04g000885	14-3-3 protein 10	0.23533	0.471004	0.364058	0.00696567	0.0965964	0.255765	Biological Process: leaf development (GO:0048366);	--	--	[T]	Signal transduction mechanisms
	Capana06g000018	universal stress protein a-like protein	0.120348	0.477585	0.207341	-0.0823609	0.0697333	0.236831	Biological Process: response to stress (GO:0006950);	--	--	[T]	Signal transduction mechanisms
	Capana06g003059	universal stress protein a-like protein	0.233407	0.401038	0.154478	-0.222232	-0.00144776	-0.219983	Biological Process: response to stress (GO:0006950);	--	--	[T]	Signal transduction mechanisms
	Capana06g000850	phytochrome-associated serine threonine-protein phosphatase	0.157956	0.316075	0.491517	0.00581839	0.325197	0.230775	Biological Process: regulation of auxin polar transport (GO:2000012);	--	--	[T]	Signal transduction mechanisms
	Capana00g001032	universal stress protein a-like protein	-0.0864465	-0.406785	-0.153907	-0.072015	-0.00670577	-0.0144079	Biological Process: response to stress (GO:0006950);	--	--	[T]	Signal transduction mechanisms
	Capana06g000087	ekc keops complex subunit bud32-like isoform x1	-0.0199354	-0.30407	-0.224977	0.0099415	-0.083105	-0.118251	--	--	--	[T]	Signal transduction mechanisms
Photosynthesis	Capana00g001154	PsbB	-0.151265	-0.0916713	-0.14354	-0.0517746	0.0946978	-0.291427	Biological Process: protein-chromophore linkage (GO:0018298);	K02704|Capana00g001154	Photosynthesis (ko00195)	--	--
	Capana00g001211	PsbA	-0.180355	-0.428138	-0.101694	0.0874345	0.0677932	-0.245309	Molecular Function: electron transporter, transferring electrons within the cyclic electron transport pathway of photosynthesis activity (GO:0045156);	K02703|Capana00g001211	Photosynthesis (ko00195)	--	--
	Capana01g001865	PsbA	-0.132512	-0.0791454	-0.00726304	0.0353991	0.0801565	-0.239473	Molecular Function: metal ion binding (GO:0046872);	K02703|Capana01g001865	Photosynthesis (ko00195)	--	--
	Capana01g003214	PetB	0.0299556	-0.0230609	-0.394188	-0.00667494	-0.14108	-0.533815	Molecular Function: electron transporter, transferring electrons within cytochrome b6/f complex of photosystem II activity (GO:0045158);	K02635|Capana01g003214	Photosynthesis (ko00195)	[C]	Energy production and conversion
	Capana02g000651	PsaA	-0.167987	-0.0562388	-0.0651043	0.094717	0.0999057	-0.0889775	Molecular Function: 4 iron, 4 sulfur cluster binding (GO:0051539);	K02689|Capana02g000651	Photosynthesis (ko00195)	--	--
	Capana02g000862	PetA	-0.149767	-0.17712	-0.175173	0.036162	0.0407333	-0.22075	Cellular Component: integral component of thylakoid membrane (GO:0031361);	K02634|Capana02g000862	Photosynthesis (ko00195)	--	--
	Capana02g002577	PetH	-0.0739308	-0.202341	-0.375067	-0.203184	-0.22903	-0.596732	Molecular Function: NADP binding (GO:0050661);	K02641|Capana02g002577	Photosynthesis (ko00195)	[P]	Inorganic ion transport and metabolism
	Capana03g000290	PsaH	0.00703123	-0.087653	-0.00480597	-0.0502482	-0.0960826	-0.0064524	Biological Process: regulation of protein dephosphorylation (GO:0035304);	K02695|Capana03g000290	Photosynthesis (ko00195)	--	--
	Capana03g001474	PsaA	-0.0826657	-0.0953407	-0.304231	-0.139219	-0.0899135	-0.45107	Molecular Function: 4 iron, 4 sulfur cluster binding (GO:0051539);	K02689|Capana03g001474	Photosynthesis (ko00195)	--	--
	Capana03g002267	PetC	-0.0155288	0.0103986	-0.0556096	-0.0268196	0.0751203	-0.125673	Biological Process: response to karrikin (GO:0080167);	K02636|Capana03g002267	Photosynthesis (ko00195)	[C]	Energy production and conversion
	Capana03g003995	alpha	-0.10133	-0.0445005	-0.304379	-0.0079746	-0.0997362	-0.370209	Molecular Function: proton-transporting ATPase activity, rotational mechanism (GO:0046961);	K02111|Capana03g003995	Oxidative phosphorylation (ko00190);; Photosynthesis (ko00195)	[C]	Energy production and conversion
	Capana04g000192	PsaE	0.438338	0.0865456	-0.0596697	-0.143646	0.0429647	-0.133267	Biological Process: divalent metal ion transport (GO:0070838);	K02693|Capana04g000192	Photosynthesis (ko00195)	--	--
	Capana04g000951	b	-0.248734	-0.11878	-0.318383	0.0746754	-0.195572	-0.493637	Molecular Function: proton-transporting ATP synthase activity, rotational mechanism (GO:0046933);	K02109|Capana04g000951	Oxidative phosphorylation (ko00190);; Photosynthesis (ko00195)	[C]	Energy production and conversion
	Capana04g001789	epsilon	-0.0951957	-0.318868	-0.330511	-0.0148339	-0.0795188	-0.387574	Molecular Function: proton-transporting ATPase activity, rotational mechanism (GO:0046961);	K02114|Capana04g001789	Oxidative phosphorylation (ko00190);; Photosynthesis (ko00195)	[C]	Energy production and conversion
	Capana06g000155	PsaE	-0.0380542	-0.0973173	-0.0472955	-0.0100327	0.191207	-0.147788	Biological Process: organic substance metabolic process (GO:0071704);	K02693|Capana06g000155	Photosynthesis (ko00195)	--	--
	Capana06g000621	PsaO	-0.0672273	-1.16144	-0.0111222	-0.0179866	-0.0551354	-0.250576	Biological Process: divalent metal ion transport (GO:0070838);	K14332|Capana06g000621	Photosynthesis (ko00195)	--	--
	Capana08g000733	PsaB	-0.0920015	-0.0412227	-0.174905	-0.0283878	0.0433221	-0.213653	Molecular Function: 4 iron, 4 sulfur cluster binding (GO:0051539);	K02690|Capana08g000733	Photosynthesis (ko00195)	--	--
	Capana09g001087	Psb28	0.0263656	-0.0907362	-0.125993	-0.0490351	-0.0462146	-0.244237	Biological Process: cuticle development (GO:0042335);	K08903|Capana09g001087	Photosynthesis (ko00195)	--	--
	Capana12g001382	delta	0.00805477	-0.275564	-0.166787	-0.0870629	-0.194292	-0.427465	Biological Process: cellular response to oxygen-containing compound (GO:1901701);	K02113|Capana12g001382	Oxidative phosphorylation (ko00190);; Photosynthesis (ko00195)	[C]	Energy production and conversion
	Capana00g000771	a	-0.0695479	0.16073	0.0189538	-0.000740413	-0.368663	-0.538349	Molecular Function: proton-transporting ATP synthase activity, rotational mechanism (GO:0046933);	K02108|Capana00g000771	Oxidative phosphorylation (ko00190);; Photosynthesis (ko00195)	[C]	Energy production and conversion
	Capana02g001321	PsaF	-0.0169654	0.101034	-0.241913	-0.110096	0.0618567	-0.298604	Biological Process: cysteine biosynthetic process (GO:0019344);	K02694|Capana02g001321	Photosynthesis (ko00195)	--	--
	Capana02g002193	gamma	-0.0165341	-0.00133357	-0.251264	-0.129969	-0.204931	-0.43375	Biological Process: regulation of root morphogenesis (GO:2000067);	K02115|Capana02g002193	Oxidative phosphorylation (ko00190);; Photosynthesis (ko00195)	[C]	Energy production and conversion
	Capana03g001476	PsbC	-0.131328	0.156648	-0.0826429	-0.126342	0.090318	-0.358327	Molecular Function: electron transporter, transferring electrons within the cyclic electron transport pathway of photosynthesis activity (GO:0045156);	K02705|Capana03g001476	Photosynthesis (ko00195)	--	--
	Capana03g001477	PsbD	-0.076884	-0.0530676	-0.251956	-0.101582	0.0642528	-0.306291	Molecular Function: electron transporter, transferring electrons within the cyclic electron transport pathway of photosynthesis activity (GO:0045156);	K02706|Capana03g001477	Photosynthesis (ko00195)	--	--
	Capana04g000129	PetE	0.0905833	-0.062748	-0.165093	-0.192804	-0.221034	-0.3037	Biological Process: copper ion homeostasis (GO:0055070);	K02638|Capana04g000129	Photosynthesis (ko00195)	[C]	Energy production and conversion
	Capana05g001872	beta	-0.0689688	0.00654482	-0.246944	-0.050247	-0.0944022	-0.389724	Molecular Function: proton-transporting ATPase activity, rotational mechanism (GO:0046961);	K02112|Capana05g001872	Oxidative phosphorylation (ko00190);; Photosynthesis (ko00195)	[C]	Energy production and conversion
	Capana06g001463	b	-0.0460424	-0.000925101	-0.199001	-0.0377025	-0.203691	-0.389022	Biological Process: response to oxygen-containing compound (GO:1901700);	K02109|Capana06g001463	Oxidative phosphorylation (ko00190);; Photosynthesis (ko00195)	[C]	Energy production and conversion
	Capana06g001714	PsbS	-0.120294	-0.202211	-0.105102	-0.080295	-0.169776	-0.28195	Biological Process: response to karrikin (GO:0080167);	K03542|Capana06g001714	Photosynthesis (ko00195)	--	--
	Capana07g000048	PsaA	-0.0817297	-0.205031	-0.180973	-0.0723076	0.0607101	-0.308032	Molecular Function: 4 iron, 4 sulfur cluster binding (GO:0051539);	K02689|Capana07g000048	Photosynthesis (ko00195)	--	--
	Capana07g002488	PsbR	-0.00730744	0.0878609	0.120315	-0.155434	0.0279979	-0.324822	Biological Process: cysteine biosynthetic process (GO:0019344);	K03541|Capana07g002488	Photosynthesis (ko00195)	--	--
Carbohydrate metabolism	Capana02g000198	pyruvate cytosolic isozyme	-0.118221	-0.0542874	0.0438044	-0.498711	-0.225365	-0.561596	Biological Process: response to cadmium ion (GO:0046686);	K00873|Capana02g000198	Glycolysis / Gluconeogenesis (ko00010);; Purine metabolism (ko00230);; Pyruvate metabolism (ko00620);; Carbon metabolism (ko01200);; Biosynthesis of amino acids (ko01230)	[G]	Carbohydrate transport and metabolism
	Capana03g000757	aldose 1-epimerase-like	-0.129147	-0.132492	-0.362882	-0.237474	-0.447102	-0.490073	Molecular Function: carbohydrate binding (GO:0030246);	K01785|Capana03g000757	Glycolysis / Gluconeogenesis (ko00010);; Galactose metabolism (ko00052)	[G]	Carbohydrate transport and metabolism
	Capana12g002630	atp-dependent 6-phosphofructokinase chloroplastic	0.0693414	-0.411985	-0.0394902	0.119545	0.439305	0.072502	Biological Process: carbohydrate derivative metabolic process (GO:1901135);	K00850|Capana12g002630	Glycolysis / Gluconeogenesis (ko00010);; Pentose phosphate pathway (ko00030);; Fructose and mannose metabolism (ko00051);; Galactose metabolism (ko00052);; Carbon metabolism (ko01200);; Biosynthesis of amino acids (ko01230);; RNA degradation (ko03018)	[G]	Carbohydrate transport and metabolism
	Capana07g002456	phosphoglycerate chloroplastic	-0.0543052	-0.158558	-0.131907	-0.125139	-0.105987	-0.289842	Biological Process: divalent metal ion transport (GO:0070838);	K00927|Capana07g002456	Glycolysis / Gluconeogenesis (ko00010);; Carbon fixation in photosynthetic organisms (ko00710);; Carbon metabolism (ko01200);; Biosynthesis of amino acids (ko01230)	[G]	Carbohydrate transport and metabolism
	Capana02g000489	fructose-bisphosphate aldolase chloroplastic	-0.198148	-0.364123	-0.418943	0.0616238	-0.0879094	-0.29637	Cellular Component: apoplast (GO:0048046);	K01623|Capana02g000489	Glycolysis / Gluconeogenesis (ko00010);; Pentose phosphate pathway (ko00030);; Fructose and mannose metabolism (ko00051);; Carbon fixation in photosynthetic organisms (ko00710);; Carbon metabolism (ko01200);; Biosynthesis of amino acids (ko01230)	[G]	Carbohydrate transport and metabolism
	Capana02g002621	fructose-bisphosphate aldolase chloroplastic-like	-0.135983	-0.127159	-0.0482308	-0.11529	-0.113348	-0.298456	Cellular Component: apoplast (GO:0048046);	K01623|Capana02g002621	Glycolysis / Gluconeogenesis (ko00010);; Pentose phosphate pathway (ko00030);; Fructose and mannose metabolism (ko00051);; Carbon fixation in photosynthetic organisms (ko00710);; Carbon metabolism (ko01200);; Biosynthesis of amino acids (ko01230)	[G]	Carbohydrate transport and metabolism
	Capana08g002624	fructose-bisphosphate aldolase chloroplastic-like	-0.123469	-0.0890087	-0.302806	-0.0670238	-0.220022	-0.347664	Cellular Component: apoplast (GO:0048046);	K01623|Capana08g002624	Glycolysis / Gluconeogenesis (ko00010);; Pentose phosphate pathway (ko00030);; Fructose and mannose metabolism (ko00051);; Carbon fixation in photosynthetic organisms (ko00710);; Carbon metabolism (ko01200);; Biosynthesis of amino acids (ko01230)	[G]	Carbohydrate transport and metabolism
	Capana06g000896	glyceraldehyde-3-phosphate cytosolic-like	-0.058646	0.136512	0.191344	-0.0159415	0.144989	0.448006	Biological Process: oxidation-reduction process (GO:0055114);	K00134|Capana06g000896	Glycolysis / Gluconeogenesis (ko00010);; Carbon fixation in photosynthetic organisms (ko00710);; Carbon metabolism (ko01200);; Biosynthesis of amino acids (ko01230)	[G]	Carbohydrate transport and metabolism
	Capana07g002457	phosphoglycerate cytosolic	0.0619461	0.123847	0.34273	0.0671384	0.136631	0.502375	Biological Process: divalent metal ion transport (GO:0070838);	K00927|Capana07g002457	Glycolysis / Gluconeogenesis (ko00010);; Carbon fixation in photosynthetic organisms (ko00710);; Carbon metabolism (ko01200);; Biosynthesis of amino acids (ko01230)	[G]	Carbohydrate transport and metabolism
	Capana09g002348	enolase (2-phospho-d-glycerate hydroylase)	0.0611115	0.0713037	0.414104	-0.0234759	0.00928445	0.406734	Cellular Component: apoplast (GO:0048046);	K01689|Capana09g002348	Glycolysis / Gluconeogenesis (ko00010);; Carbon metabolism (ko01200);; Biosynthesis of amino acids (ko01230);; RNA degradation (ko03018)	[G]	Carbohydrate transport and metabolism
	Capana05g002227	dihydrolipoyl mitochondrial	0.0216052	0.0832339	-0.148662	-0.145581	-0.112915	-0.298586	Biological Process: oxidation-reduction process (GO:0055114);	K00382|Capana05g002227	Glycolysis / Gluconeogenesis (ko00010);; Citrate cycle (TCA cycle) (ko00020);; Glycine, serine and threonine metabolism (ko00260);; Valine, leucine and isoleucine degradation (ko00280);; Pyruvate metabolism (ko00620);; Carbon metabolism (ko01200)	[C]	Energy production and conversion
	Capana03g001381	glyceraldehyde-3-phosphate cytosolic-like	0.0610385	0.119599	0.382085	0.114861	0.134276	0.457037	Biological Process: oxidation-reduction process (GO:0055114);	K00134|Capana03g001381	Glycolysis / Gluconeogenesis (ko00010);; Carbon fixation in photosynthetic organisms (ko00710);; Carbon metabolism (ko01200);; Biosynthesis of amino acids (ko01230)	[G]	Carbohydrate transport and metabolism
	Capana00g001764	fructose-bisphosphate aldolase cytoplasmic isozyme-like	0.0370286	0.0407326	0.102794	0.0796534	0.110414	0.374886	Biological Process: response to karrikin (GO:0080167);	K01623|Capana00g001764	Glycolysis / Gluconeogenesis (ko00010);; Pentose phosphate pathway (ko00030);; Fructose and mannose metabolism (ko00051);; Carbon fixation in photosynthetic organisms (ko00710);; Carbon metabolism (ko01200);; Biosynthesis of amino acids (ko01230)	[G]	Carbohydrate transport and metabolism
	Capana10g001330	fructose- - chloroplastic-like	-0.0492639	-0.197335	0.199356	-0.147963	-0.251778	-0.304042	Biological Process: divalent metal ion transport (GO:0070838);	K03841|Capana10g001330	Glycolysis / Gluconeogenesis (ko00010);; Pentose phosphate pathway (ko00030);; Fructose and mannose metabolism (ko00051);; Carbon fixation in photosynthetic organisms (ko00710);; Carbon metabolism (ko01200)	[G]	Carbohydrate transport and metabolism
	Capana10g001955	fructose-bisphosphate aldolase cytoplasmic isozyme-like	0.00628377	0.00685367	0.368347	0.0581949	0.0800759	0.54088	Biological Process: response to karrikin (GO:0080167);	K01623|Capana10g001955	Glycolysis / Gluconeogenesis (ko00010);; Pentose phosphate pathway (ko00030);; Fructose and mannose metabolism (ko00051);; Carbon fixation in photosynthetic organisms (ko00710);; Carbon metabolism (ko01200);; Biosynthesis of amino acids (ko01230)	[G]	Carbohydrate transport and metabolism
	Capana06g002716	triosephosphate cytosolic	0.125337	0.336865	0.481847	0.0674202	0.183639	0.651311	Biological Process: primary root development (GO:0080022);	K01803|Capana06g002716	Glycolysis / Gluconeogenesis (ko00010);; Fructose and mannose metabolism (ko00051);; Inositol phosphate metabolism (ko00562);; Carbon fixation in photosynthetic organisms (ko00710);; Carbon metabolism (ko01200);; Biosynthesis of amino acids (ko01230)	[G]	Carbohydrate transport and metabolism
	Capana11g002347	probable fructose-bisphosphate aldolase chloroplastic	0.0816307	0.17864	0.235503	-0.0172161	0.123485	0.323183	Cellular Component: apoplast (GO:0048046);	K01623|Capana11g002347	Glycolysis / Gluconeogenesis (ko00010);; Pentose phosphate pathway (ko00030);; Fructose and mannose metabolism (ko00051);; Carbon fixation in photosynthetic organisms (ko00710);; Carbon metabolism (ko01200);; Biosynthesis of amino acids (ko01230)	[G]	Carbohydrate transport and metabolism
	Capana05g000670	pyruvate cytosolic isozyme	-0.0346642	0.157649	0.33062	0.0806617	0.193284	0.575652	Biological Process: seed development (GO:0048316);	K00873|Capana05g000670	Glycolysis / Gluconeogenesis (ko00010);; Purine metabolism (ko00230);; Pyruvate metabolism (ko00620);; Carbon metabolism (ko01200);; Biosynthesis of amino acids (ko01230)	[G]	Carbohydrate transport and metabolism
	Capana10g001920	pyruvate cytosolic isozyme-like	0.0405985	0.0380626	0.434966	-0.0202724	0.157194	0.558249	Biological Process: organic substance biosynthetic process (GO:1901576);	K00873|Capana10g001920	Glycolysis / Gluconeogenesis (ko00010);; Purine metabolism (ko00230);; Pyruvate metabolism (ko00620);; Carbon metabolism (ko01200);; Biosynthesis of amino acids (ko01230)	[G]	Carbohydrate transport and metabolism
	Capana06g000586	probable 2-carboxy-d-arabinitol-1-phosphatase	-0.0210149	-0.0428076	-0.266213	-0.0863331	-0.113274	-0.34572	Cellular Component: chloroplast (GO:0009507);	K15634|Capana06g000586	Glycolysis / Gluconeogenesis (ko00010);; Glycine, serine and threonine metabolism (ko00260);; Carbon metabolism (ko01200);; Biosynthesis of amino acids (ko01230)	[G]	Carbohydrate transport and metabolism
	Capana04g000881	glucose-6-phosphate isomerase chloroplastic	-0.0189297	-0.041333	-0.147929	-0.158008	-0.167567	-0.296866	Biological Process: positive regulation of catalytic activity (GO:0043085);	K01810|Capana04g000881	Glycolysis / Gluconeogenesis (ko00010);; Pentose phosphate pathway (ko00030);; Starch and sucrose metabolism (ko00500);; Amino sugar and nucleotide sugar metabolism (ko00520);; Carbon metabolism (ko01200)	[G]	Carbohydrate transport and metabolism
	Capana03g002430	chloroplastic isoform x2	-0.0379795	0.0164683	-0.323018	-0.0709939	-0.115632	-0.283732	Biological Process: gametophyte development (GO:0048229);	K01835|Capana03g002430	Glycolysis / Gluconeogenesis (ko00010);; Pentose phosphate pathway (ko00030);; Galactose metabolism (ko00052);; Purine metabolism (ko00230);; Starch and sucrose metabolism (ko00500);; Amino sugar and nucleotide sugar metabolism (ko00520)	[G]	Carbohydrate transport and metabolism
	Capana03g002431	chloroplastic isoform x2	-0.0106472	-0.200125	-0.425959	-0.116932	-0.19418	-0.531808	Biological Process: gametophyte development (GO:0048229);	K01835|Capana03g002431	Glycolysis / Gluconeogenesis (ko00010);; Pentose phosphate pathway (ko00030);; Galactose metabolism (ko00052);; Purine metabolism (ko00230);; Starch and sucrose metabolism (ko00500);; Amino sugar and nucleotide sugar metabolism (ko00520)	[G]	Carbohydrate transport and metabolism
	Capana03g004610	pyruvate kinase isozyme chloroplastic	-0.0732233	-0.155289	0.178543	0.224105	-0.0284336	0.390454	Biological Process: response to cadmium ion (GO:0046686);	K00873|Capana03g004610	Glycolysis / Gluconeogenesis (ko00010);; Purine metabolism (ko00230);; Pyruvate metabolism (ko00620);; Carbon metabolism (ko01200);; Biosynthesis of amino acids (ko01230)	[G]	Carbohydrate transport and metabolism
	Capana05g002203	dihydrolipoyl dehydrogenase chloroplastic-like	-0.422092	-0.34946	-0.703346	-0.0031643	-0.255738	-0.643715	Biological Process: organic substance biosynthetic process (GO:1901576);	K00382|Capana05g002203	Glycolysis / Gluconeogenesis (ko00010);; Citrate cycle (TCA cycle) (ko00020);; Glycine, serine and threonine metabolism (ko00260);; Valine, leucine and isoleucine degradation (ko00280);; Pyruvate metabolism (ko00620);; Carbon metabolism (ko01200)	[C]	Energy production and conversion
	Capana02g003390	aldose 1-epimerase-like	0.121133	-0.034447	-0.141987	-0.0274898	0.00328258	-0.271415	Molecular Function: carbohydrate binding (GO:0030246);	K01785|Capana02g003390	Glycolysis / Gluconeogenesis (ko00010);; Galactose metabolism (ko00052)	[G]	Carbohydrate transport and metabolism
	Capana09g000231	hexokinase-1-like isoform x1	-0.0289908	-0.0294484	-0.160148	-0.0543947	-0.0477199	-0.379432	Biological Process: root hair cell development (GO:0080147);	K00844|Capana09g000231	Glycolysis / Gluconeogenesis (ko00010);; Fructose and mannose metabolism (ko00051);; Galactose metabolism (ko00052);; Starch and sucrose metabolism (ko00500);; Amino sugar and nucleotide sugar metabolism (ko00520);; Carbon metabolism (ko01200)	[G]	Carbohydrate transport and metabolism
	Capana02g003387	aldose 1-epimerase-like	-0.0478501	-0.156064	-0.474518	0.034237	-0.178368	-0.592965	Molecular Function: carbohydrate binding (GO:0030246);	K01785|Capana02g003387	Glycolysis / Gluconeogenesis (ko00010);; Galactose metabolism (ko00052)	[G]	Carbohydrate transport and metabolism
	Capana02g001007	glucose-6-phosphate 1-epimerase	0.0248657	0.0284564	0.228129	-0.0616173	0.0982722	0.320931	Molecular Function: catalytic activity (GO:0003824);	K01792|Capana02g001007	Glycolysis / Gluconeogenesis (ko00010)	[G]	Carbohydrate transport and metabolism
	Capana04g000900	cytoplasmic	-0.523043	-0.747656	-0.667819	-0.0134807	0.0297473	0.0149503	Biological Process: gametophyte development (GO:0048229);	K01835|Capana04g000900	Glycolysis / Gluconeogenesis (ko00010);; Pentose phosphate pathway (ko00030);; Galactose metabolism (ko00052);; Purine metabolism (ko00230);; Starch and sucrose metabolism (ko00500);; Amino sugar and nucleotide sugar metabolism (ko00520)	[G]	Carbohydrate transport and metabolism
	Capana09g001643	fructose- - chloroplastic-like	-0.221842	-0.37942	-0.28182	0.0172725	-0.161945	-0.182036	Biological Process: divalent metal ion transport (GO:0070838);	K03841|Capana09g001643	Glycolysis / Gluconeogenesis (ko00010);; Pentose phosphate pathway (ko00030);; Fructose and mannose metabolism (ko00051);; Carbon fixation in photosynthetic organisms (ko00710);; Carbon metabolism (ko01200)	[G]	Carbohydrate transport and metabolism
	Capana05g002207	dihydrolipoyl dehydrogenase chloroplastic-like	-0.249328	-0.310357	-0.339461	0.138794	-0.0980965	-0.220866	Biological Process: organic substance biosynthetic process (GO:1901576);	K00382|Capana05g002207	Glycolysis / Gluconeogenesis (ko00010);; Citrate cycle (TCA cycle) (ko00020);; Glycine, serine and threonine metabolism (ko00260);; Valine, leucine and isoleucine degradation (ko00280);; Pyruvate metabolism (ko00620);; Carbon metabolism (ko01200)	[C]	Energy production and conversion
	Capana01g000823	pyruvate kinase isozyme chloroplastic	-0.0261435	-0.294366	0.230526	-0.153142	-0.0893268	0.0761876	Biological Process: cellular component organization or biogenesis (GO:0071840);	K00873|Capana01g000823	Glycolysis / Gluconeogenesis (ko00010);; Purine metabolism (ko00230);; Pyruvate metabolism (ko00620);; Carbon metabolism (ko01200);; Biosynthesis of amino acids (ko01230)	[G]	Carbohydrate transport and metabolism
	Capana07g000871	glucose-6-phosphate 1-epimerase	-0.049582	-0.309899	-0.269491	0.0310478	0.0698755	-0.123838	Molecular Function: glucose-6-phosphate 1-epimerase activity (GO:0047938);	K01792|Capana07g000871	Glycolysis / Gluconeogenesis (ko00010)	[G]	Carbohydrate transport and metabolism
	Capana00g003437	glucose-6-phosphate 1-epimerase	-0.0717644	0.315471	-0.260031	-0.0270074	0.0494446	-0.21111	Molecular Function: glucose-6-phosphate 1-epimerase activity (GO:0047938);	K01792|Capana00g003437	Glycolysis / Gluconeogenesis (ko00010)	[G]	Carbohydrate transport and metabolism
	Capana05g000740	pyruvate dehydrogenase e1 component subunit beta- chloroplastic-like	-0.214785	-0.293957	-0.248675	0.102784	-0.106915	-0.44364	Biological Process: oxidation-reduction process (GO:0055114);	K00162|Capana05g000740	Glycolysis / Gluconeogenesis (ko00010);; Citrate cycle (TCA cycle) (ko00020);; Pyruvate metabolism (ko00620);; Carbon metabolism (ko01200)	[C]	Energy production and conversion
	Capana07g001111	atp-dependent 6-phosphofructokinase 6 {eco:0000255	0.00194893	0.382743	0.411987	-0.126919	0.127437	0.234084	Biological Process: phosphorylation (GO:0016310);	K00850|Capana07g001111	Glycolysis / Gluconeogenesis (ko00010);; Pentose phosphate pathway (ko00030);; Fructose and mannose metabolism (ko00051);; Galactose metabolism (ko00052);; Carbon metabolism (ko01200);; Biosynthesis of amino acids (ko01230);; RNA degradation (ko03018)	[G]	Carbohydrate transport and metabolism
	Capana10g000224	glyceraldehyde-3-phosphate dehydrogenase chloroplastic-like	0.185647	0.153766	0.658316	-0.0711249	-0.0571903	-0.0615005	Biological Process: amino acid homeostasis (GO:0080144);	K00134|Capana10g000224	Glycolysis / Gluconeogenesis (ko00010);; Carbon fixation in photosynthetic organisms (ko00710);; Carbon metabolism (ko01200);; Biosynthesis of amino acids (ko01230)	[G]	Carbohydrate transport and metabolism
	Capana03g000245	hexokinase 3	-0.189901	-0.135419	-0.401062	0.189469	0.208753	0.0107584	Biological Process: root hair cell development (GO:0080147);	K00844|Capana03g000245	Glycolysis / Gluconeogenesis (ko00010);; Fructose and mannose metabolism (ko00051);; Galactose metabolism (ko00052);; Starch and sucrose metabolism (ko00500);; Amino sugar and nucleotide sugar metabolism (ko00520);; Carbon metabolism (ko01200)	[G]	Carbohydrate transport and metabolism
	Capana09g000016	pyruvate dehydrogenase e1 component subunit alpha- chloroplastic-like	-0.123197	-0.110977	-0.3039	0.213266	-0.0373487	-0.0751855	Biological Process: oxidation-reduction process (GO:0055114);	K00161|Capana09g000016	Glycolysis / Gluconeogenesis (ko00010);; Citrate cycle (TCA cycle) (ko00020);; Pyruvate metabolism (ko00620);; Carbon metabolism (ko01200)	[C]	Energy production and conversion
	Capana10g001347	pyruvate decarboxylase 1-like	-0.0203486	0.132167	0.42711	-0.220201	-0.180995	0.131732	Molecular Function: thiamine pyrophosphate binding (GO:0030976);	K01568|Capana10g001347	Glycolysis / Gluconeogenesis (ko00010)	[GHR]	--
	Capana05g002227	dihydrolipoyl mitochondrial	0.0216052	0.0832339	-0.148662	-0.145581	-0.112915	-0.298586	Biological Process: oxidation-reduction process (GO:0055114);	K00382|Capana05g002227	Glycolysis / Gluconeogenesis (ko00010);; Citrate cycle (TCA cycle) (ko00020);; Glycine, serine and threonine metabolism (ko00260);; Valine, leucine and isoleucine degradation (ko00280);; Pyruvate metabolism (ko00620);; Carbon metabolism (ko01200)	[C]	Energy production and conversion
	Capana08g002141	malate glyoxysomal	-0.00674683	-0.00629606	-0.277738	-0.029439	-0.0441484	-0.300236	Biological Process: regulation of photorespiration (GO:0080093);	K00026|Capana08g002141	Citrate cycle (TCA cycle) (ko00020);; Cysteine and methionine metabolism (ko00270);; Pyruvate metabolism (ko00620);; Glyoxylate and dicarboxylate metabolism (ko00630);; Carbon fixation in photosynthetic organisms (ko00710);; Carbon metabolism (ko01200)	[C]	Energy production and conversion
	Capana02g000618	malate glyoxysomal	-0.147886	0.0321122	0.121389	0.0924296	0.244999	0.653394	Biological Process: regulation of photorespiration (GO:0080093);	K00026|Capana02g000618	Citrate cycle (TCA cycle) (ko00020);; Cysteine and methionine metabolism (ko00270);; Pyruvate metabolism (ko00620);; Glyoxylate and dicarboxylate metabolism (ko00630);; Carbon fixation in photosynthetic organisms (ko00710);; Carbon metabolism (ko01200)	[C]	Energy production and conversion
	Capana05g002203	dihydrolipoyl dehydrogenase chloroplastic-like	-0.422092	-0.34946	-0.703346	-0.0031643	-0.255738	-0.643715	Biological Process: organic substance biosynthetic process (GO:1901576);	K00382|Capana05g002203	Glycolysis / Gluconeogenesis (ko00010);; Citrate cycle (TCA cycle) (ko00020);; Glycine, serine and threonine metabolism (ko00260);; Valine, leucine and isoleucine degradation (ko00280);; Pyruvate metabolism (ko00620);; Carbon metabolism (ko01200)	[C]	Energy production and conversion
	Capana00g003043	citrate glyoxysomal	0.0724085	0.123452	0.292349	-0.00412936	0.100051	0.336799	Biological Process: proteasome core complex assembly (GO:0080129);	K01647|Capana00g003043	Citrate cycle (TCA cycle) (ko00020);; Glyoxylate and dicarboxylate metabolism (ko00630);; Carbon metabolism (ko01200);; 2-Oxocarboxylic acid metabolism (ko01210);; Biosynthesis of amino acids (ko01230)	[C]	Energy production and conversion
	Capana01g003224	citrate mitochondrial	0.155422	0.273412	0.202933	-0.00778855	0.237698	0.236819	Biological Process: organic substance catabolic process (GO:1901575);	K01647|Capana01g003224	Citrate cycle (TCA cycle) (ko00020);; Glyoxylate and dicarboxylate metabolism (ko00630);; Carbon metabolism (ko01200);; 2-Oxocarboxylic acid metabolism (ko01210);; Biosynthesis of amino acids (ko01230)	[C]	Energy production and conversion
	Capana05g002207	dihydrolipoyl dehydrogenase chloroplastic-like	-0.249328	-0.310357	-0.339461	0.138794	-0.0980965	-0.220866	Biological Process: organic substance biosynthetic process (GO:1901576);	K00382|Capana05g002207	Glycolysis / Gluconeogenesis (ko00010);; Citrate cycle (TCA cycle) (ko00020);; Glycine, serine and threonine metabolism (ko00260);; Valine, leucine and isoleucine degradation (ko00280);; Pyruvate metabolism (ko00620);; Carbon metabolism (ko01200)	[C]	Energy production and conversion
	Capana05g000740	pyruvate dehydrogenase e1 component subunit beta- chloroplastic-like	-0.214785	-0.293957	-0.248675	0.102784	-0.106915	-0.34364	Biological Process: oxidation-reduction process (GO:0055114);	K00162|Capana05g000740	Glycolysis / Gluconeogenesis (ko00010);; Citrate cycle (TCA cycle) (ko00020);; Pyruvate metabolism (ko00620);; Carbon metabolism (ko01200)	[C]	Energy production and conversion
	Capana09g000016	pyruvate dehydrogenase e1 component subunit alpha- chloroplastic-like	-0.123197	-0.110977	-0.3039	0.213266	-0.0373487	-0.0751855	Biological Process: oxidation-reduction process (GO:0055114);	K00161|Capana09g000016	Glycolysis / Gluconeogenesis (ko00010);; Citrate cycle (TCA cycle) (ko00020);; Pyruvate metabolism (ko00620);; Carbon metabolism (ko01200)	[C]	Energy production and conversion
	Capana02g001342	probable ribose-5-phosphate isomerase chloroplastic	-0.504778	-0.53329	-0.500626	-0.273344	-0.441718	-0.615275	Biological Process: response to oxygen-containing compound (GO:1901700);	K01807|Capana02g001342	Pentose phosphate pathway (ko00030);; Carbon fixation in photosynthetic organisms (ko00710);; Carbon metabolism (ko01200);; Biosynthesis of amino acids (ko01230)	[G]	Carbohydrate transport and metabolism
	Capana12g002630	atp-dependent 6-phosphofructokinase chloroplastic	-0.0693414	-0.411985	-0.23949	-0.119545	-0.439305	-0.472502	Biological Process: carbohydrate derivative metabolic process (GO:1901135);	K00850|Capana12g002630	Glycolysis / Gluconeogenesis (ko00010);; Pentose phosphate pathway (ko00030);; Fructose and mannose metabolism (ko00051);; Galactose metabolism (ko00052);; Carbon metabolism (ko01200);; Biosynthesis of amino acids (ko01230);; RNA degradation (ko03018)	[G]	Carbohydrate transport and metabolism
	Capana02g000489	fructose-bisphosphate aldolase chloroplastic	-0.198148	-0.364123	-0.418943	0.0616238	-0.0879094	-0.29637	Cellular Component: apoplast (GO:0048046);	K01623|Capana02g000489	Glycolysis / Gluconeogenesis (ko00010);; Pentose phosphate pathway (ko00030);; Fructose and mannose metabolism (ko00051);; Carbon fixation in photosynthetic organisms (ko00710);; Carbon metabolism (ko01200);; Biosynthesis of amino acids (ko01230)	[G]	Carbohydrate transport and metabolism
	Capana02g002621	fructose-bisphosphate aldolase chloroplastic-like	-0.135983	-0.127159	-0.0482308	-0.11529	-0.113348	-0.298456	Cellular Component: apoplast (GO:0048046);	K01623|Capana02g002621	Glycolysis / Gluconeogenesis (ko00010);; Pentose phosphate pathway (ko00030);; Fructose and mannose metabolism (ko00051);; Carbon fixation in photosynthetic organisms (ko00710);; Carbon metabolism (ko01200);; Biosynthesis of amino acids (ko01230)	[G]	Carbohydrate transport and metabolism
	Capana08g002624	fructose-bisphosphate aldolase chloroplastic-like	-0.123469	-0.0890087	-0.302806	-0.0670238	-0.220022	-0.347664	Cellular Component: apoplast (GO:0048046);	K01623|Capana08g002624	Glycolysis / Gluconeogenesis (ko00010);; Pentose phosphate pathway (ko00030);; Fructose and mannose metabolism (ko00051);; Carbon fixation in photosynthetic organisms (ko00710);; Carbon metabolism (ko01200);; Biosynthesis of amino acids (ko01230)	[G]	Carbohydrate transport and metabolism
	Capana02g000067	chloroplastic	-0.0798363	-0.186989	-0.393074	-0.100599	-0.170308	-0.512823	Molecular Function: metal ion binding (GO:0046872);	K00615|Capana02g000067	Pentose phosphate pathway (ko00030);; Carbon fixation in photosynthetic organisms (ko00710);; Carbon metabolism (ko01200);; Biosynthesis of amino acids (ko01230)	[G]	Carbohydrate transport and metabolism
	Capana03g000806	ribulose-phosphate 3- chloroplastic	-0.0334089	-0.240145	-0.285742	-0.151957	-0.157046	-0.377431	Cellular Component: apoplast (GO:0048046);	K01783|Capana03g000806	Pentose phosphate pathway (ko00030);; Pentose and glucuronate interconversions (ko00040);; Carbon fixation in photosynthetic organisms (ko00710);; Carbon metabolism (ko01200);; Biosynthesis of amino acids (ko01230)	[G]	Carbohydrate transport and metabolism
	Capana00g001764	fructose-bisphosphate aldolase cytoplasmic isozyme-like	0.0370286	0.0407326	0.102794	0.0796534	0.110414	0.374886	Biological Process: response to karrikin (GO:0080167);	K01623|Capana00g001764	Glycolysis / Gluconeogenesis (ko00010);; Pentose phosphate pathway (ko00030);; Fructose and mannose metabolism (ko00051);; Carbon fixation in photosynthetic organisms (ko00710);; Carbon metabolism (ko01200);; Biosynthesis of amino acids (ko01230)	[G]	Carbohydrate transport and metabolism
	Capana10g001330	fructose- - chloroplastic-like	-0.0492639	-0.197335	0.199356	-0.147963	-0.251778	-0.304042	Biological Process: divalent metal ion transport (GO:0070838);	K03841|Capana10g001330	Glycolysis / Gluconeogenesis (ko00010);; Pentose phosphate pathway (ko00030);; Fructose and mannose metabolism (ko00051);; Carbon fixation in photosynthetic organisms (ko00710);; Carbon metabolism (ko01200)	[G]	Carbohydrate transport and metabolism
	Capana02g000066	chloroplastic	-0.0441347	-0.139361	-0.265185	-0.0999529	-0.199727	-0.482393	Molecular Function: metal ion binding (GO:0046872);	K00615|Capana02g000066	Pentose phosphate pathway (ko00030);; Carbon fixation in photosynthetic organisms (ko00710);; Carbon metabolism (ko01200);; Biosynthesis of amino acids (ko01230)	[G]	Carbohydrate transport and metabolism
	Capana10g001955	fructose-bisphosphate aldolase cytoplasmic isozyme-like	0.00628377	0.00685367	0.368347	0.0581949	0.0800759	0.54088	Biological Process: response to karrikin (GO:0080167);	K01623|Capana10g001955	Glycolysis / Gluconeogenesis (ko00010);; Pentose phosphate pathway (ko00030);; Fructose and mannose metabolism (ko00051);; Carbon fixation in photosynthetic organisms (ko00710);; Carbon metabolism (ko01200);; Biosynthesis of amino acids (ko01230)	[G]	Carbohydrate transport and metabolism
	Capana11g002347	probable fructose-bisphosphate aldolase chloroplastic	0.0816307	0.17864	0.235503	-0.0172161	0.123485	0.323183	Cellular Component: apoplast (GO:0048046);	K01623|Capana11g002347	Glycolysis / Gluconeogenesis (ko00010);; Pentose phosphate pathway (ko00030);; Fructose and mannose metabolism (ko00051);; Carbon fixation in photosynthetic organisms (ko00710);; Carbon metabolism (ko01200);; Biosynthesis of amino acids (ko01230)	[G]	Carbohydrate transport and metabolism
	Capana00g002731	6-phosphogluconate decarboxylating 3-like	0.0711532	-0.00438287	-0.069764	-0.0393864	-0.0792187	-0.298411	Biological Process: cell wall pectin metabolic process (GO:0052546);	K00033|Capana00g002731	Pentose phosphate pathway (ko00030);; Glutathione metabolism (ko00480);; Carbon metabolism (ko01200)	[G]	Carbohydrate transport and metabolism
	Capana04g000881	glucose-6-phosphate isomerase chloroplastic	-0.0189297	-0.041333	-0.147929	-0.158008	-0.167567	-0.296866	Biological Process: positive regulation of catalytic activity (GO:0043085);	K01810|Capana04g000881	Glycolysis / Gluconeogenesis (ko00010);; Pentose phosphate pathway (ko00030);; Starch and sucrose metabolism (ko00500);; Amino sugar and nucleotide sugar metabolism (ko00520);; Carbon metabolism (ko01200)	[G]	Carbohydrate transport and metabolism
	Capana03g002430	chloroplastic isoform x2	-0.0379795	0.0164683	-0.323018	-0.0709939	-0.115632	-0.283732	Biological Process: gametophyte development (GO:0048229);	K01835|Capana03g002430	Glycolysis / Gluconeogenesis (ko00010);; Pentose phosphate pathway (ko00030);; Galactose metabolism (ko00052);; Purine metabolism (ko00230);; Starch and sucrose metabolism (ko00500);; Amino sugar and nucleotide sugar metabolism (ko00520)	[G]	Carbohydrate transport and metabolism
	Capana03g002431	chloroplastic isoform x2	-0.0106472	-0.200125	-0.425959	-0.116932	-0.19418	-0.531808	Biological Process: gametophyte development (GO:0048229);	K01835|Capana03g002431	Glycolysis / Gluconeogenesis (ko00010);; Pentose phosphate pathway (ko00030);; Galactose metabolism (ko00052);; Purine metabolism (ko00230);; Starch and sucrose metabolism (ko00500);; Amino sugar and nucleotide sugar metabolism (ko00520)	[G]	Carbohydrate transport and metabolism
	Capana02g003611	glucose-6-phosphate 1- cytoplasmic isoform	0.128379	0.285495	0.198272	0.0322884	0.165383	0.295678	Molecular Function: NADP binding (GO:0050661);	K00036|Capana02g003611	Pentose phosphate pathway (ko00030);; Glutathione metabolism (ko00480);; Carbon metabolism (ko01200)	--	--
	Capana07g002053	probable ribokinase	-0.186698	-0.427256	-0.436048	-0.140494	-0.235516	-0.521575	Biological Process: response to oxygen-containing compound (GO:1901700);	K00852|Capana07g002053	Pentose phosphate pathway (ko00030)	[G]	Carbohydrate transport and metabolism
	Capana10g000875	ribose-phosphate pyrophosphokinase 1	0.102316	0.313556	0.438829	-0.0588436	-0.0395784	0.273805	Biological Process: phosphorylation (GO:0016310);	K00948|Capana10g000875	Pentose phosphate pathway (ko00030);; Purine metabolism (ko00230);; Carbon metabolism (ko01200);; Biosynthesis of amino acids (ko01230)	[FE]	--
	Capana03g001931	probable 6-phosphogluconolactonase chloroplastic	0.127626	0.68666	0.517414	-0.00251889	0.209844	0.491615	Biological Process: cellular response to redox state (GO:0071461);	K01057|Capana03g001931	Pentose phosphate pathway (ko00030);; Carbon metabolism (ko01200)	[G]	Carbohydrate transport and metabolism
	Capana07g002052	probable ribokinase	-0.0729249	-0.101251	-0.373277	0.0841546	-0.10474	-0.571094	Molecular Function: transferase activity, transferring phosphorus-containing groups (GO:0016772);	K00852|Capana07g002052	Pentose phosphate pathway (ko00030)	[G]	Carbohydrate transport and metabolism
	Capana04g000900	cytoplasmic	-0.523043	-0.747656	-0.667819	-0.0134807	0.0297473	0.0149503	Biological Process: gametophyte development (GO:0048229);	K01835|Capana04g000900	Glycolysis / Gluconeogenesis (ko00010);; Pentose phosphate pathway (ko00030);; Galactose metabolism (ko00052);; Purine metabolism (ko00230);; Starch and sucrose metabolism (ko00500);; Amino sugar and nucleotide sugar metabolism (ko00520)	[G]	Carbohydrate transport and metabolism
	Capana09g001643	fructose- - chloroplastic-like	-0.221842	-0.37942	-0.28182	0.0172725	-0.161945	-0.182036	Biological Process: divalent metal ion transport (GO:0070838);	K03841|Capana09g001643	Glycolysis / Gluconeogenesis (ko00010);; Pentose phosphate pathway (ko00030);; Fructose and mannose metabolism (ko00051);; Carbon fixation in photosynthetic organisms (ko00710);; Carbon metabolism (ko01200)	[G]	Carbohydrate transport and metabolism
	Capana07g001192	glucose-6-phosphate 1- chloroplastic	0.0547925	-0.389209	-0.085312	0.0517182	-0.132159	-0.178372	Molecular Function: NADP binding (GO:0050661);	K00036|Capana07g001192	Pentose phosphate pathway (ko00030);; Glutathione metabolism (ko00480);; Carbon metabolism (ko01200)	[G]	Carbohydrate transport and metabolism
	Capana11g001995	probable 6-phosphogluconolactonase 1	0.233453	0.541001	0.0997486	0.0235589	0.187602	-0.19486	Biological Process: cellular response to redox state (GO:0071461);	K01057|Capana11g001995	Pentose phosphate pathway (ko00030);; Carbon metabolism (ko01200)	[G]	Carbohydrate transport and metabolism
	Capana07g001111	atp-dependent 6-phosphofructokinase 6 {eco:0000255	-0.00194893	-0.382743	-0.411987	-0.126919	-0.127437	-0.734084	Biological Process: phosphorylation (GO:0016310);	K00850|Capana07g001111	Glycolysis / Gluconeogenesis (ko00010);; Pentose phosphate pathway (ko00030);; Fructose and mannose metabolism (ko00051);; Galactose metabolism (ko00052);; Carbon metabolism (ko01200);; Biosynthesis of amino acids (ko01230);; RNA degradation (ko03018)	[G]	Carbohydrate transport and metabolism
Stress defense	Capana05g002535	thioredoxin f- chloroplastic-like	-0.109723	-0.550774	-0.259889	-0.0510549	-0.282805	-0.356641	Biological Process: protein oligomerization (GO:0051259);	--	--	[OC]	--
	Capana04g000290	thioredoxin h-type 1	0.163609	0.39173	0.694166	0.0624057	0.213253	0.72102	Biological Process: protein oligomerization (GO:0051259);	--	--	[OC]	--
	Capana10g000070	thioredoxin-like	-0.0655989	-0.0641717	-0.387408	0.0221412	-0.0352335	-0.278197	Cellular Component: apoplast (GO:0048046);	--	--	[OC]	--
	Capana01g002883	thioredoxin peroxidase 1	0.11375	-0.0508064	0.517187	-0.0375479	0.133539	0.333556	Biological Process: oxidation-reduction process (GO:0055114);	--	--	[O]	Posttranslational modification, protein turnover, chaperones
	Capana10g002214	thioredoxin reductase ntrc	-0.053798	-0.0906612	-0.418562	-0.0498897	-0.0917657	-0.398029	Biological Process: oxidation-reduction process (GO:0055114);	K00384|Capana10g002214	Pyrimidine metabolism (ko00240);; Selenocompound metabolism (ko00450)	[O]	Posttranslational modification, protein turnover, chaperones
	Capana09g000887	thioredoxin chloroplastic-like	0.0172264	-0.142407	-0.312213	-0.0951774	-0.227346	-0.375725	Cellular Component: apoplast (GO:0048046);	--	--	[OC]	--
	Capana10g002424	thioredoxin-like 3- chloroplastic	-0.00102464	-0.0601319	-0.0097636	-0.0385434	0.0573887	-0.326636	Cellular Component: cell periphery (GO:0071944);	--	--	[OC]	--
	Capana04g001638	thioredoxin-like chloroplastic	-0.111814	-0.32091	-0.391859	-0.147266	-0.169375	-0.389871	Cellular Component: cell periphery (GO:0071944);	--	--	[OC]	--
	Capana08g002361	thioredoxin chloroplastic	0.0296684	-0.2082	0.614805	0.1381	0.248561	0.361841	Biological Process: regulation of biological process (GO:0050789);	--	--	[OC]	--
	Capana08g000045	thioredoxin chloroplastic	-0.0322567	0.0187272	0	-0.0628705	-0.232173	-0.283981	Biological Process: regulation of cellular process (GO:0050794);	--	--	[OC]	--
	Capana02g003415	thioredoxin h2	-0.0685932	-0.100937	0.655173	0.071652	0.136204	0.614918	Biological Process: protein oligomerization (GO:0051259);	--	--	[OC]	--
	Capana10g000375	thioredoxin m- chloroplastic-like	0.0237486	-0.0456106	0.619931	0.0811411	-0.0386534	0.558559	Cellular Component: apoplast (GO:0048046);	--	--	[OC]	--
	Capana07g002194	thioredoxin chloroplastic-like	0.0815674	-0.29032	-0.0385665	-0.141784	0.0649011	0.0337041	Cellular Component: apoplast (GO:0048046);	--	--	[OC]	--
	Capana02g001146	thioredoxin mitochondrial	-0.108565	0.173065	-0.306368	-0.0578301	0.0172598	-0.120849	Biological Process: protein oligomerization (GO:0051259);	--	--	[OC]	--
	Capana03g002156	heat shock protein 83	0.473716	0.895843	1.76789	0.370141	0.722588	1.65222	Biological Process: stomatal closure (GO:0090332);	K04079|Capana03g002156	Protein processing in endoplasmic reticulum (ko04141);; Plant-pathogen interaction (ko04626)	[O]	Posttranslational modification, protein turnover, chaperones
	Capana06g002498	heat shock protein 83	0.564415	0.754923	2.1882	0.470541	0.87886	1.98087	Biological Process: stomatal closure (GO:0090332);	K04079|Capana06g002498	Protein processing in endoplasmic reticulum (ko04141);; Plant-pathogen interaction (ko04626)	[O]	Posttranslational modification, protein turnover, chaperones
	Capana03g001908	small heat shock chloroplastic	0.456711	1.10712	2.07221	0.272614	0.944425	1.28524	Biological Process: protein oligomerization (GO:0051259);	K13993|Capana03g001908	Protein processing in endoplasmic reticulum (ko04141)	[O]	Posttranslational modification, protein turnover, chaperones
	Capana02g003315	chaperone protein chloroplastic	0.352324	0.634426	0.879138	0.472444	0.679299	0.809457	Biological Process: protein import into chloroplast stroma (GO:0045037);	--	--	[O]	Posttranslational modification, protein turnover, chaperones
	Capana03g000552	heat shock 70 kda protein	0.502596	0.938247	1.51852	0.549273	0.904152	1.26789	Biological Process: response to karrikin (GO:0080167);	K03283|Capana03g000552	Spliceosome (ko03040);; Protein processing in endoplasmic reticulum (ko04141);; Endocytosis (ko04144)	[O]	Posttranslational modification, protein turnover, chaperones
	Capana12g001312	heat shock 70 kda protein 15-like	0.315119	0.325142	0.710575	0.311397	0.304656	0.601166	Biological Process: organic substance catabolic process (GO:1901575);	--	--	[O]	Posttranslational modification, protein turnover, chaperones
	Capana08g002266	PREDICTED: 17.3 kDa class I heat shock protein-like [Erythranthe guttatus] &gt;gnl	0.498522	1.0483	1.63831	0.421792	0.791085	1.51203	Biological Process: response to copper ion (GO:0046688);	K13993|Capana08g002266	Protein processing in endoplasmic reticulum (ko04141)	[O]	Posttranslational modification, protein turnover, chaperones
	Capana08g002262	PREDICTED: 18.2 kDa class I heat shock protein-like [Erythranthe guttatus] &gt;gnl	0.785023	1.29759	2.1329	0.781862	1.09735	1.83756	Biological Process: protein oligomerization (GO:0051259);	K13993|Capana08g002262	Protein processing in endoplasmic reticulum (ko04141)	[O]	Posttranslational modification, protein turnover, chaperones
	Capana03g000835	chaperone protein 1	0.484865	0.69807	0.490004	0.688651	0.713713	0.598481	Biological Process: positive regulation of translation (GO:0045727);	--	--	[O]	Posttranslational modification, protein turnover, chaperones
	Capana03g000834	chaperone protein 1	0.534196	0.643473	0.63115	0.62725	0.469838	0.400678	Biological Process: positive regulation of translation (GO:0045727);	--	--	[O]	Posttranslational modification, protein turnover, chaperones
	Capana01g000574	PREDICTED: LOW QUALITY PROTEIN: small heat shock protein, chloroplastic [Nelumbo nucifera]	0.773028	1.06822	1.26082	0.678285	0.874392	1.37371	Biological Process: response to cadmium ion (GO:0046686);	K13993|Capana01g000574	Protein processing in endoplasmic reticulum (ko04141)	[O]	Posttranslational modification, protein turnover, chaperones
	Capana06g000386	AF123256_1 17.8 kD class I small heat shock protein [Solanum lycopersicum]	0.565638	0.954027	1.30855	0.547116	0.757467	1.25935	Biological Process: protein oligomerization (GO:0051259);	K13993|Capana06g000386	Protein processing in endoplasmic reticulum (ko04141)	[O]	Posttranslational modification, protein turnover, chaperones
	Capana06g000385	kda class i heat shock	0.187506	0.4083	1.34926	0.663983	1.16087	1.60767	Biological Process: protein oligomerization (GO:0051259);	K13993|Capana06g000385	Protein processing in endoplasmic reticulum (ko04141)	[O]	Posttranslational modification, protein turnover, chaperones
	Capana01g000575	PREDICTED: 23.6 kDa heat shock protein, mitochondrial [Vitis vinifera] &gt;gnl	0.300373	0.372494	1.06605	0.485117	0.594792	1.31281	Biological Process: response to cadmium ion (GO:0046686);	K13993|Capana01g000575	Protein processing in endoplasmic reticulum (ko04141)	[O]	Posttranslational modification, protein turnover, chaperones
	Capana05g000431	kda class iv heat shock protein	0.427784	0.56164	0.782988	0.774839	0.798305	1.23895	Biological Process: protein oligomerization (GO:0051259);	K13993|Capana05g000431	Protein processing in endoplasmic reticulum (ko04141)	[O]	Posttranslational modification, protein turnover, chaperones
	Capana02g003579	17.6 kDa class I small heat shock family protein [Populus trichocarpa] &gt;gnl	0.526758	0.846618	1.34873	0.745736	1.05454	1.20434	Biological Process: protein oligomerization (GO:0051259);	K13993|Capana02g003579	Protein processing in endoplasmic reticulum (ko04141)	[O]	Posttranslational modification, protein turnover, chaperones
	Capana12g001307	heat shock 70 kda protein 15-like	0.400023	0.350153	0.850234	0.186787	0.286018	0.651604	Biological Process: oxidation-reduction process (GO:0055114);	--	--	[O]	Posttranslational modification, protein turnover, chaperones
	Capana08g002165	heat shock 70 kda mitochondrial-like	0.182132	0.412067	1.21534	0.134485	0.351906	0.961063	Molecular Function: unfolded protein binding (GO:0051082);	K04043|Capana08g002165	RNA degradation (ko03018)	[O]	Posttranslational modification, protein turnover, chaperones
	Capana08g002169	heat shock 70 kda mitochondrial-like	0.200998	0.416712	0.96941	0.0881905	0.290912	0.85328	Molecular Function: unfolded protein binding (GO:0051082);	K04043|Capana08g002169	RNA degradation (ko03018)	[O]	Posttranslational modification, protein turnover, chaperones
	Capana03g003720	heat shock 70 kda protein 8	0.295601	0.447285	0.703847	0.245713	0.375459	0.767512	Biological Process: response to karrikin (GO:0080167);	--	--	[O]	Posttranslational modification, protein turnover, chaperones
	Capana06g000387	kda class i heat shock	0.376302	0.771922	1.01064	0.237146	0.389389	0.919406	Biological Process: protein oligomerization (GO:0051259);	K13993|Capana06g000387	Protein processing in endoplasmic reticulum (ko04141)	[O]	Posttranslational modification, protein turnover, chaperones
	Capana12g000677	nedd8-conjugating enzyme ubc12	0.392386	0.844771	1.28403	-0.135352	0.341243	0.837884	Biological Process: organic substance biosynthetic process (GO:1901576);	K10579|Capana12g000677	Ubiquitin mediated proteolysis (ko04120)	[O]	Posttranslational modification, protein turnover, chaperones
	Capana09g001757	17.5 kd heat shock family protein [Populus trichocarpa] &gt;gnl	0.246948	0.680674	1.62874	0.190522	0.293569	1.45705	Biological Process: protein oligomerization (GO:0051259);	K13993|Capana09g001757	Protein processing in endoplasmic reticulum (ko04141)	[O]	Posttranslational modification, protein turnover, chaperones
	Capana09g001928	heat shock cognate 70 kda protein 2-like	0.153169	0.307741	0.507262	0.0279529	0.192645	0.423401	Biological Process: response to karrikin (GO:0080167);	K03283|Capana09g001928	Spliceosome (ko03040);; Protein processing in endoplasmic reticulum (ko04141);; Endocytosis (ko04144)	[O]	Posttranslational modification, protein turnover, chaperones
	Capana07g002410	heat shock cognate protein 80-like	0.10792	0.190673	0.831713	-0.0312821	0.101455	0.623221	Biological Process: stomatal closure (GO:0090332);	K04079|Capana07g002410	Protein processing in endoplasmic reticulum (ko04141);; Plant-pathogen interaction (ko04626)	[O]	Posttranslational modification, protein turnover, chaperones
	Capana10g000190	heat shock cognate protein 80-like	0.107325	0.169925	0.740317	0.0538985	0.119569	0.667323	Biological Process: organic substance biosynthetic process (GO:1901576);	K04079|Capana10g000190	Protein processing in endoplasmic reticulum (ko04141);; Plant-pathogen interaction (ko04626)	[O]	Posttranslational modification, protein turnover, chaperones
	Capana11g002133	heat shock protein 90-1-like	0.0732554	0.3127	0.778093	0.0232017	0.13586	0.694457	Biological Process: stomatal closure (GO:0090332);	K09487|Capana11g002133	Protein processing in endoplasmic reticulum (ko04141);; Plant-pathogen interaction (ko04626)	[O]	Posttranslational modification, protein turnover, chaperones
	Capana05g002262	chaperonin cpn60- mitochondrial	0.110648	0.27907	0.692225	0.0239295	0.153686	0.747031	Biological Process: plant ovule development (GO:0048481);	K04077|Capana05g002262	RNA degradation (ko03018)	[O]	Posttranslational modification, protein turnover, chaperones
	Capana03g004399	chaperonin cpn60- mitochondrial	0.0741552	0.326869	0.704432	-0.0139069	0.0854424	0.798947	Biological Process: chaperone-mediated protein complex assembly (GO:0051131);	K04077|Capana03g004399	RNA degradation (ko03018)	[O]	Posttranslational modification, protein turnover, chaperones
	Capana05g002401	dehydroascorbate reductase	0.151671	0.423315	0.577009	0.0159984	0.089658	0.433449	Biological Process: oxidation-reduction process (GO:0055114);	--	--	[O]	Posttranslational modification, protein turnover, chaperones
	Capana07g001239	heat shock protein 83	0.0375366	0.392375	0.901766	-0.0144127	0.102401	0.898722	Biological Process: organic substance biosynthetic process (GO:1901576);	K09487|Capana07g001239	Protein processing in endoplasmic reticulum (ko04141);; Plant-pathogen interaction (ko04626)	[O]	Posttranslational modification, protein turnover, chaperones
	Capana08g001532	26s protease regulatory subunit 6a homolog	0.0319945	0.101018	0.174971	0.0476796	0.0769483	0.349691	Biological Process: seedling development (GO:0090351);	K03065|Capana08g001532	Proteasome (ko03050)	[O]	Posttranslational modification, protein turnover, chaperones
	Capana00g004931	26s protease regulatory subunit 7 homolog a-like	0.140616	0.264073	0.432382	-0.0409856	0.139295	0.41948	Biological Process: seedling development (GO:0090351);	K03061|Capana00g004931	Proteasome (ko03050)	[O]	Posttranslational modification, protein turnover, chaperones
	Capana00g002164	probable glutathione s-transferase	0.025505	0.0681275	0.767433	-0.124908	0.208242	0.343083	Biological Process: regulation of response to red or far red light (GO:2000030);	K00799|Capana00g002164	Glutathione metabolism (ko00480)	[O]	Posttranslational modification, protein turnover, chaperones
	Capana07g001493	26s proteasome non-atpase regulatory subunit 11 homolog	0.0569143	0.114153	0.247362	0.0573732	0.0598381	0.423229	Biological Process: proteasome core complex assembly (GO:0080129);	K03036|Capana07g001493	Proteasome (ko03050)	[O]	Posttranslational modification, protein turnover, chaperones
	Capana06g000351	peptidyl-prolyl cis-trans isomerase cyp19-4	0.0187397	0.020648	0.136052	0.17097	0.0801853	0.37932	Biological Process: organic cyclic compound biosynthetic process (GO:1901362);	--	--	[O]	Posttranslational modification, protein turnover, chaperones
	Capana06g002301	chaperone protein mitochondrial isoform x1	-0.441551	-0.378623	-0.113906	0.0785506	0.233879	0.64573	Biological Process: organic cyclic compound biosynthetic process (GO:1901362);	--	--	[O]	Posttranslational modification, protein turnover, chaperones
	Capana06g000161	26s proteasome regulatory subunit 4 homolog a	-0.076649	-0.0553856	0.127265	0.00244152	0.0304653	0.327781	Biological Process: seedling development (GO:0090351);	K03062|Capana06g000161	Proteasome (ko03050)	[O]	Posttranslational modification, protein turnover, chaperones
	Capana06g002303	chaperone protein mitochondrial isoform x2	0.135327	0.270157	0.496038	0.0404572	0.155437	0.467173	Biological Process: protein import into chloroplast stroma (GO:0045037);	--	--	[O]	Posttranslational modification, protein turnover, chaperones
	Capana07g001123	heat shock 70 kda protein 17	-0.0759038	-0.0128439	0.890661	0.019517	-0.0531954	0.768877	Biological Process: oxidation-reduction process (GO:0055114);	K09486|Capana07g001123	Protein processing in endoplasmic reticulum (ko04141)	[O]	Posttranslational modification, protein turnover, chaperones
	Capana08g000722	26s proteasome non-atpase regulatory subunit 6 homolog	-0.0440823	0.138365	0.14244	0.01805	0.0077634	0.349887	Biological Process: proteasome core complex assembly (GO:0080129);	K03037|Capana08g000722	Proteasome (ko03050)	[O]	Posttranslational modification, protein turnover, chaperones
	Capana11g000393	ubiquitin-conjugating enzyme e2-23 kda-like	0.17392	0.364036	0.537377	0.0483052	0.326249	0.764881	Biological Process: response to cadmium ion (GO:0046686);	K10576|Capana11g000393	Ubiquitin mediated proteolysis (ko04120)	[O]	Posttranslational modification, protein turnover, chaperones
	Capana03g000593	chaperone protein chloroplastic	-0.00777176	0.382243	0.0572392	0.0276662	0.216246	0.11241	Biological Process: protein import into chloroplast stroma (GO:0045037);	--	--	[O]	Posttranslational modification, protein turnover, chaperones
	Capana01g003678	ubiquitin-conjugating enzyme e2 variant 1d	-0.276088	-0.500946	-0.663145	0.166974	0.129225	-0.370169	Biological Process: photoperiodism, flowering (GO:0048573);	--	--	[O]	Posttranslational modification, protein turnover, chaperones
	Capana07g001898	small heat shock protein	0.183284	0.551221	0.386505	-0.0821623	-0.00624421	0.162163	Biological Process: cellular process (GO:0009987);	K13993|Capana07g001898	Protein processing in endoplasmic reticulum (ko04141)	[O]	Posttranslational modification, protein turnover, chaperones
	Capana01g002147	26s protease regulatory subunit 8 homolog a	0.141132	0.18619	0.363796	-0.0580458	0.0613135	0.244737	Biological Process: seedling development (GO:0090351);	K03066|Capana01g002147	Proteasome (ko03050)	[O]	Posttranslational modification, protein turnover, chaperones
	Capana02g002749	probable ubiquitin-conjugating enzyme e2 18	0.149882	0.0260042	0.302113	-0.0312735	0.0546387	0.14181	Biological Process: organic substance biosynthetic process (GO:1901576);	K10688|Capana02g002749	Ubiquitin mediated proteolysis (ko04120)	[O]	Posttranslational modification, protein turnover, chaperones
	Capana07g002011	probable glutathione s-transferase	0.0885568	0.140115	0.329239	-0.283659	-0.0688521	0.122525	Biological Process: regulation of response to red or far red light (GO:2000030);	K00799|Capana07g002011	Glutathione metabolism (ko00480)	[O]	Posttranslational modification, protein turnover, chaperones	0
	Capana02g000952	probable glutathione s-transferase-like	-0.538082	-0.529052	-0.529052	-0.317588	-0.222697	-0.16359	Biological Process: proteasome core complex assembly (GO:0080129);	K00799|Capana02g000952	Glutathione metabolism (ko00480)	[O]	Posttranslational modification, protein turnover, chaperones
	Capana02g002296	microsomal glutathione s-transferase 3	-0.00798331	0.0828728	0.310395	-0.30958	-0.333341	0.207553	Cellular Component: membrane (GO:0016020);	K00799|Capana02g002296	Glutathione metabolism (ko00480)	--	--
	Capana12g000612	glutathione s-transferase-like	-0.129314	-0.26534	-0.259933	0.350866	0.185872	-0.101533	Biological Process: organic substance biosynthetic process (GO:1901576);	K00799|Capana12g000612	Glutathione metabolism (ko00480)	--	--
	Capana12g001176	probable glutathione peroxidase 8	-0.180788	-0.934943	-1.18592	-0.513639	-1.11292	-1.32684	Biological Process: oxidation-reduction process (GO:0055114);	K00432|Capana12g001176	Glutathione metabolism (ko00480);; Arachidonic acid metabolism (ko00590)	--	--
	Capana06g003058	glutathione s-transferase-like	0.131245	0.217477	0.525579	0.0943274	0.298837	0.336526	Biological Process: alpha-amino acid catabolic process (GO:1901606);	K00799|Capana06g003058	Glutathione metabolism (ko00480)	[O]	Posttranslational modification, protein turnover, chaperones
	Capana07g002003	probable glutathione s-transferase-like	-0.00980902	0.221804	0.675872	-0.00435954	0.350009	0.45457	Biological Process: regulation of response to red or far red light (GO:2000030);	K00799|Capana07g002003	Glutathione metabolism (ko00480)	[O]	Posttranslational modification, protein turnover, chaperones
	Capana00g003106	probable glutathione s-transferase	0.293465	0.457236	1.50471	0.16536	0.508581	1.1027	Biological Process: regulation of response to red or far red light (GO:2000030);	K00799|Capana00g003106	Glutathione metabolism (ko00480)	[O]	Posttranslational modification, protein turnover, chaperones
	Capana09g001864	glutathione s-transferase l3-like isoform x1	-0.0297145	0.0737117	0.534026	-0.0328469	0.154863	0.398537	Biological Process: organic substance catabolic process (GO:1901575);	K00799|Capana09g001864	Glutathione metabolism (ko00480)	[O]	Posttranslational modification, protein turnover, chaperones
	Capana09g001764	probable glutathione s-transferase	0.0114576	0.153967	0.55281	-0.0152847	-0.00960482	0.921927	Biological Process: regulation of response to red or far red light (GO:2000030);	K00799|Capana09g001764	Glutathione metabolism (ko00480)	[O]	Posttranslational modification, protein turnover, chaperones
	Capana07g002010	probable glutathione s-transferase	0.0905582	0.23472	0.40395	-0.0261858	0.0591532	0.328401	Biological Process: regulation of response to red or far red light (GO:2000030);	K00799|Capana07g002010	Glutathione metabolism (ko00480)	[O]	Posttranslational modification, protein turnover, chaperones
	Capana00g002164	probable glutathione s-transferase	0.025505	0.0681275	0.767433	-0.124908	0.208242	0.343083	Biological Process: regulation of response to red or far red light (GO:2000030);	K00799|Capana00g002164	Glutathione metabolism (ko00480)	[O]	Posttranslational modification, protein turnover, chaperones
	Capana00g004478	probable glutathione s-transferase	0.105557	0.325424	0.0389741	0.00111062	0.159207	0.361706	Biological Process: regulation of response to red or far red light (GO:2000030);	K00799|Capana00g004478	Glutathione metabolism (ko00480)	[O]	Posttranslational modification, protein turnover, chaperones
	Capana06g000146	glutathione s-transferase omega-like 2	-0.0293293	0.0970002	-0.358793	0.0236901	-0.112733	-0.472207	Biological Process: response to cyclopentenone (GO:0010583);	--	--	[O]	Posttranslational modification, protein turnover, chaperones
	Capana00g003105	probable glutathione s-transferase	0.159879	0.0703388	0.0933744	-0.00300145	0.114285	0.310388	Biological Process: regulation of response to red or far red light (GO:2000030);	K00799|Capana00g003105	Glutathione metabolism (ko00480)	[O]	Posttranslational modification, protein turnover, chaperones
	Capana03g004566	glutathione s-transferase u9-like	0.0911083	0.0778494	0.120391	-0.0271804	0.11982	0.282735	Biological Process: regulation of response to red or far red light (GO:2000030);	K00799|Capana03g004566	Glutathione metabolism (ko00480)	[O]	Posttranslational modification, protein turnover, chaperones
	Capana12g001176	probable glutathione peroxidase 8	-0.180788	-0.934943	-1.18592	-0.513639	-1.11292	-1.32684	Biological Process: oxidation-reduction process (GO:0055114);	K00432|Capana12g001176	Glutathione metabolism (ko00480);; Arachidonic acid metabolism (ko00590)	--	--
	Capana04g001245	peroxidase 12-like	0.109182	0.117047	0.519411	-0.0667783	0.265091	-0.0709406	Biological Process: reactive oxygen species metabolic process (GO:0072593);	K00430|Capana04g001245	Phenylalanine metabolism (ko00360);; Phenylpropanoid biosynthesis (ko00940)	--	--
	Capana04g001246	peroxidase 12-like	-0.121246	-0.351472	-0.790269	-0.155073	-0.35721	-0.574532	Biological Process: oxidation-reduction process (GO:0055114);	K00430|Capana04g001246	Phenylalanine metabolism (ko00360);; Phenylpropanoid biosynthesis (ko00940)	--	--
	Capana05g002095	peroxidase p7-like	-0.0448591	-0.105853	-0.21307	-0.105728	-0.110161	-0.106017	Biological Process: cellular response to hypoxia (GO:0071456);	K00430|Capana05g002095	Phenylalanine metabolism (ko00360);; Phenylpropanoid biosynthesis (ko00940)	--	--
	Capana12g002654	peroxidase 17-like	-0.0794676	-0.095337	-0.231058	-0.00903098	-0.141786	-0.392852	Biological Process: oxidation-reduction process (GO:0055114);	K00430|Capana12g002654	Phenylalanine metabolism (ko00360);; Phenylpropanoid biosynthesis (ko00940)	[P]	Inorganic ion transport and metabolism
	Capana02g002990	peroxidase 51-like	-0.0761798	-0.173753	-0.445947	-0.193469	0.226254	-0.293259	Biological Process: oxidation-reduction process (GO:0055114);	K00430|Capana02g002990	Phenylalanine metabolism (ko00360);; Phenylpropanoid biosynthesis (ko00940)	--	--
	Capana07g001507	peroxidase 3-like	0.133219	0.352195	0.107144	0.125959	0.202126	0.0470403	Biological Process: oxidation-reduction process (GO:0055114);	K00430|Capana07g001507	Phenylalanine metabolism (ko00360);; Phenylpropanoid biosynthesis (ko00940)	--	--
	Capana05g002104	superoxide dismutase	0.272013	0.347242	0.272013	-0.110232	0.0483968	0.0464124	Biological Process: oxidation-reduction process (GO:0055114);	K04564|Capana05g002104	Peroxisome (ko04146)	[P]	Inorganic ion transport and metabolism
	Capana06g002374	superoxide dismutase	0.124967	0.142506	0.293567	-0.0591621	0.0907232	0.00839784	Biological Process: oxidation-reduction process (GO:0055114);	--	--	[P]	Inorganic ion transport and metabolism
	Capana05g002401	dehydroascorbate reductase	0.151671	0.423315	0.577009	0.0159984	0.089658	0.433449	Biological Process: oxidation-reduction process (GO:0055114);	--	--	[O]	Posttranslational modification, protein turnover, chaperones
	Capana09g001881	l-ascorbate peroxidase cytosolic	0.214345	0.467995	0.802971	0.0118947	0.371969	0.961135	Biological Process: oxidation-reduction process (GO:0055114);	K00434|Capana09g001881	Ascorbate and aldarate metabolism (ko00053);; Glutathione metabolism (ko00480)	[P]	Inorganic ion transport and metabolism
	Capana06g002525	ascorbate peroxidase	0.090265	0.172756	0.163875	-0.0311525	0.0645071	0.311489	Biological Process: oxidation-reduction process (GO:0055114);	K00434|Capana06g002525	Ascorbate and aldarate metabolism (ko00053);; Glutathione metabolism (ko00480)	[P]	Inorganic ion transport and metabolism
	Capana04g002111	probable l-ascorbate peroxidase chloroplastic isoform x1	-0.0632323	0.282381	-0.413606	-0.145092	-0.112308	-0.431152	Biological Process: oxidation-reduction process (GO:0055114);	K00434|Capana04g002111	Ascorbate and aldarate metabolism (ko00053);; Glutathione metabolism (ko00480)	[P]	Inorganic ion transport and metabolism
	Capana08g000304	l-ascorbate peroxidase 6 isoform x1	-0.604654	-0.935369	-0.997576	-0.0420303	-0.0148363	-0.41599	Cellular Component: organelle membrane (GO:0031090);	K00434|Capana08g000304	Ascorbate and aldarate metabolism (ko00053);; Glutathione metabolism (ko00480)	[P]	Inorganic ion transport and metabolism
	Capana06g001731	probable l-ascorbate peroxidase chloroplastic isoform x1	0.159667	0.222702	0.359741	-0.08092	0.0279756	0.224697	Biological Process: oxidation-reduction process (GO:0055114);	K00434|Capana06g001731	Ascorbate and aldarate metabolism (ko00053);; Glutathione metabolism (ko00480)	[P]	Inorganic ion transport and metabolism
	Capana02g002452	catalase isozyme 1	0.0962647	0.134437	0.57278	0.0745476	0.113546	0.127884	Biological Process: oxidation-reduction process (GO:0055114);	K03781|Capana02g002452	Tryptophan metabolism (ko00380);; Glyoxylate and dicarboxylate metabolism (ko00630);; Peroxisome (ko04146)	[P]	Inorganic ion transport and metabolism
